# Supplementary material for: Complexes between 2,2′-azobis(2-methylpropionamidine) dihydrochloride (AAPH) and cucurbit[n]uril hosts modulate the yield and fate of photolytically-generated AAPH radicals
Source: Royal Society of Chemistry journal article supplement (doi:10.1039/d4ra07150f), 2024-01-01
Supplement: d4ra07150f1.pdf [file d4ra07150f1.pdf]

## Supplementary Material

Complexes between 2,2'-azobis(2-methylpropionamide)  
dihydrochloride (AAPH) and cucurbit[n]uril hosts modulate the yield  
and fate of photolytically generated AAPH radicals

Angie C. Forero-Girón,<sup>a‡</sup> Mauricio Oyarzún,<sup>a‡</sup> Kevin Droguett,<sup>a</sup> Denis Fuentealba,<sup>a</sup>  
Soledad Gutiérrez-Oliva,<sup>a</sup> Barbara Herrera,<sup>a</sup> Alejandro Toro-Labbé,<sup>a</sup> Eduardo  
Fuentes-Lemus,<sup>b</sup> Michael J. Davies,<sup>b</sup> Camilo López-Alarcón<sup>a\*</sup> and Margarita E.  
Aliaga<sup>a\*</sup>

<sup>a</sup> Departamento de Química Física, Escuela de Química, Facultad de Química y de  
Farmacia, Pontificia Universidad Católica de Chile, Chile

<sup>b</sup> Department of Biomedical Sciences, Panum Institute, University of Copenhagen,  
Denmark

\*Joint corresponding authors: Margarita E. Aliaga; e-mail: [mealiaga@uc.cl](mailto:mealiaga@uc.cl) and C.  
López-Alarcón; e-mail: [clopezr@uc.cl](mailto:clopezr@uc.cl)

‡Both authors contributed equally to this work.

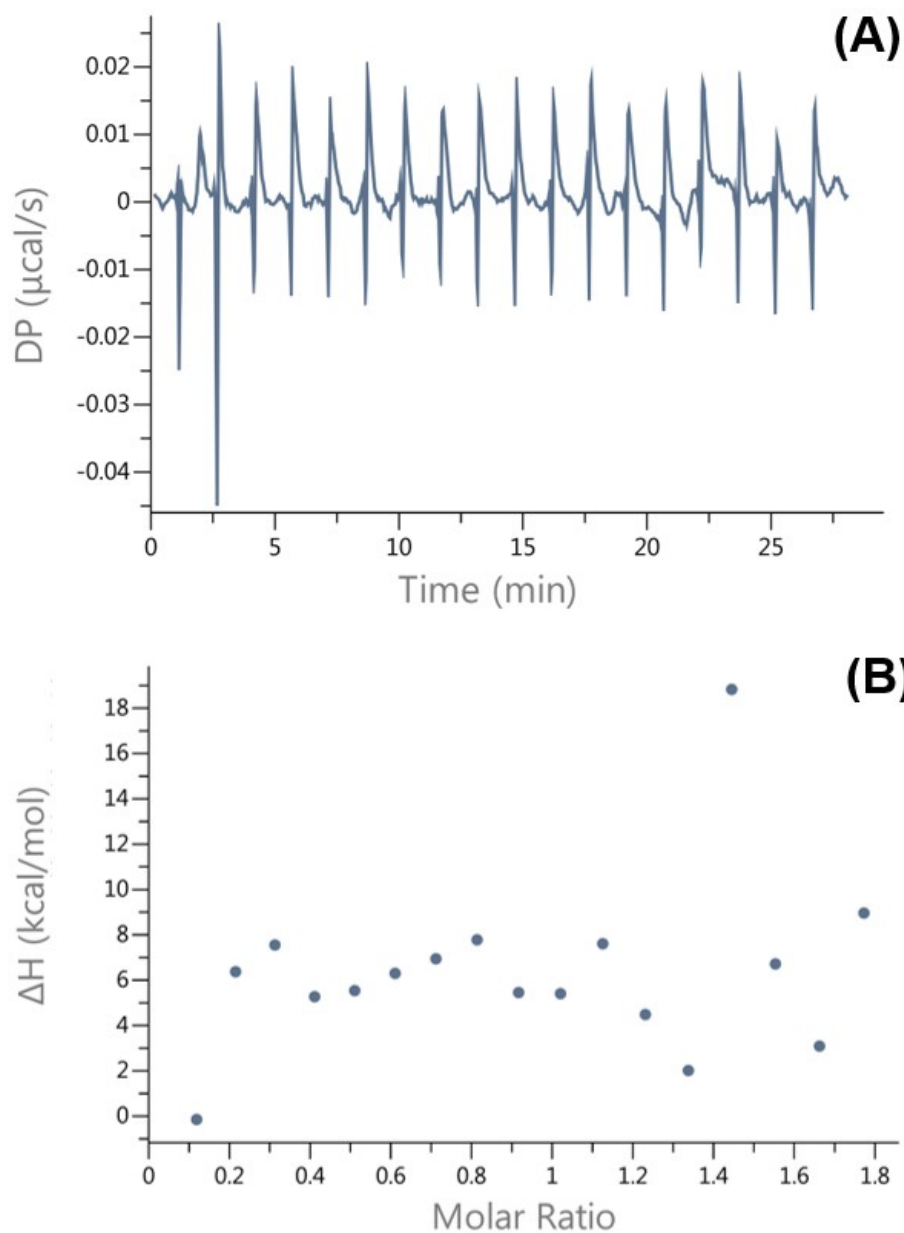

**Figure S1.** Representative enthalpogram for the interactions between AAPH and CB[6] in 10 mM phosphate buffer (pH 7.4) at 25 °C. Panel A: exothermic heat flows detected upon consecutive injections of 2  $\mu\text{L}$  AAPH (1.4 mM) into a 150  $\mu\text{M}$  CB[6] solution . Panel B: integrated heat values presented as a function of the molar ratios of the titrant and titrated species. Controls consisted of successive injections of buffer into a CB[6] solution giving heat flows accounting for dilution effects.

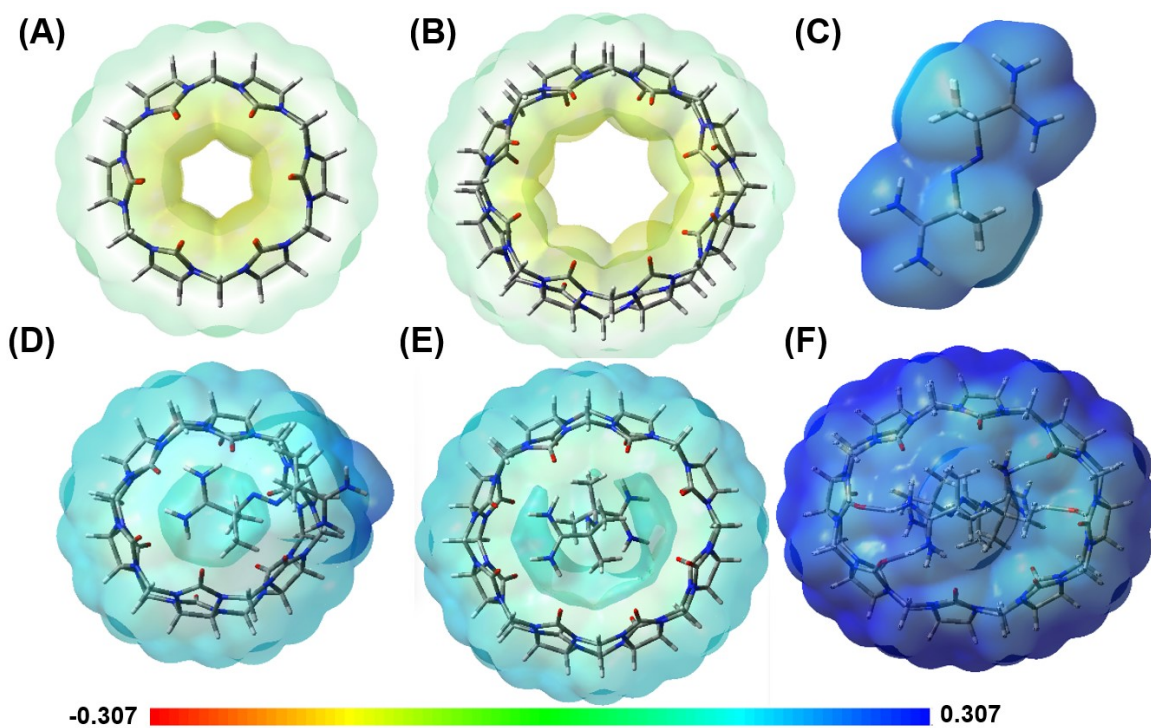

**Figure S2.** Molecular electrostatic potential (MEP) for CB[6], CB[8], AAPH, AAPH-CB[6], AAPH@CB[8] and 2AAPH@CB[8] complexes; panels A to F, respectively.

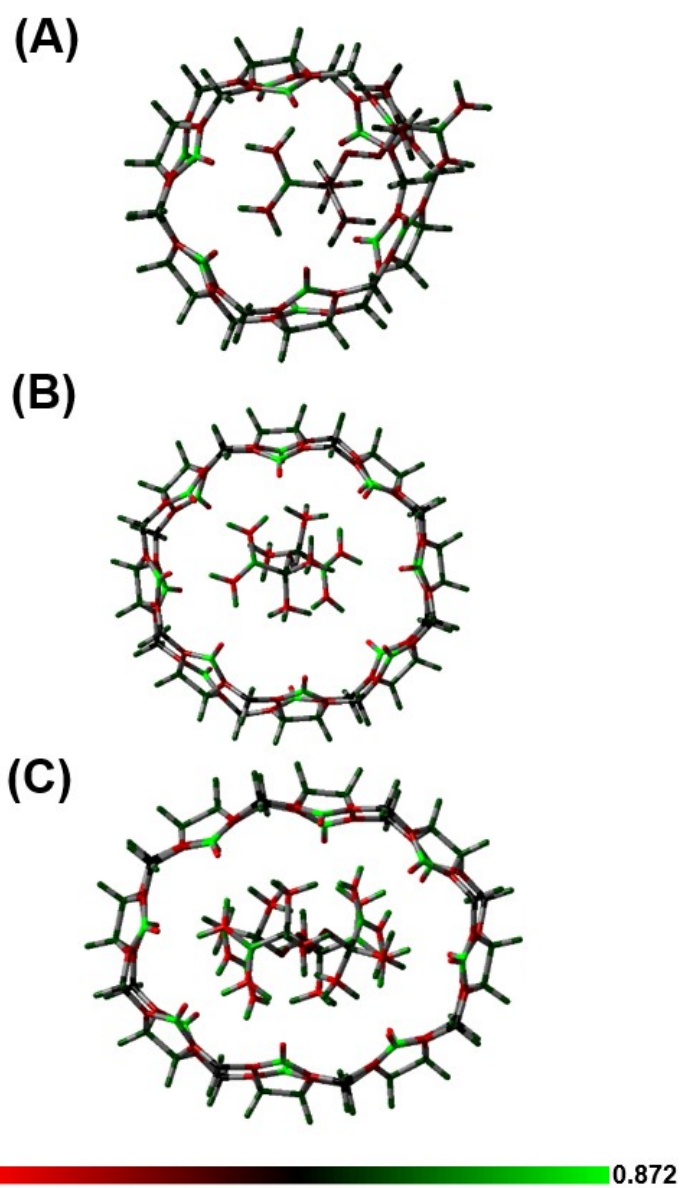

**Figure S3.** Atomic charges for AAPH-CB[6], AAPH@CB[8] and 2AAPH@CB[8] complexes, panels A, B and C, respectively.

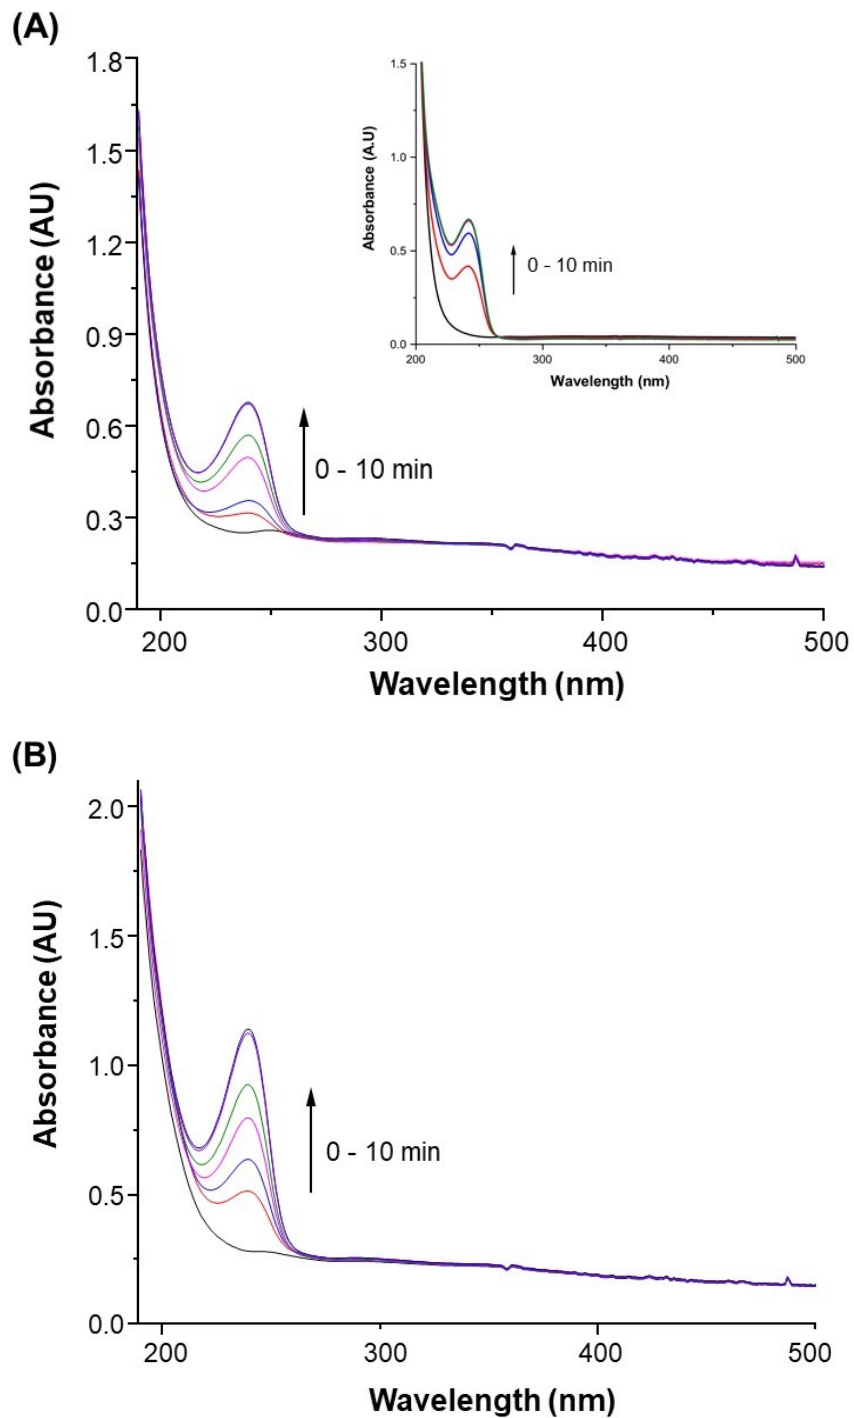

**Figure S4.** UV-vis spectra of 100  $\mu\text{M}$  (panel A) and 200  $\mu\text{M}$  (panel B) AAPH solutions irradiated at 365 nm in the absence of CB[8]. In both panels, color lines represent spectra registered at different times of irradiation (0-10 min). The insert in panel A shows the UV-vis spectra of AAPH 100  $\mu\text{M}$  solutions irradiated at 365 nm in the presence of CB[8] for increasing periods of time. Solutions were prepared in 10 mM phosphate buffer (pH 7.4) with these then irradiated as described in the Materials and methods.

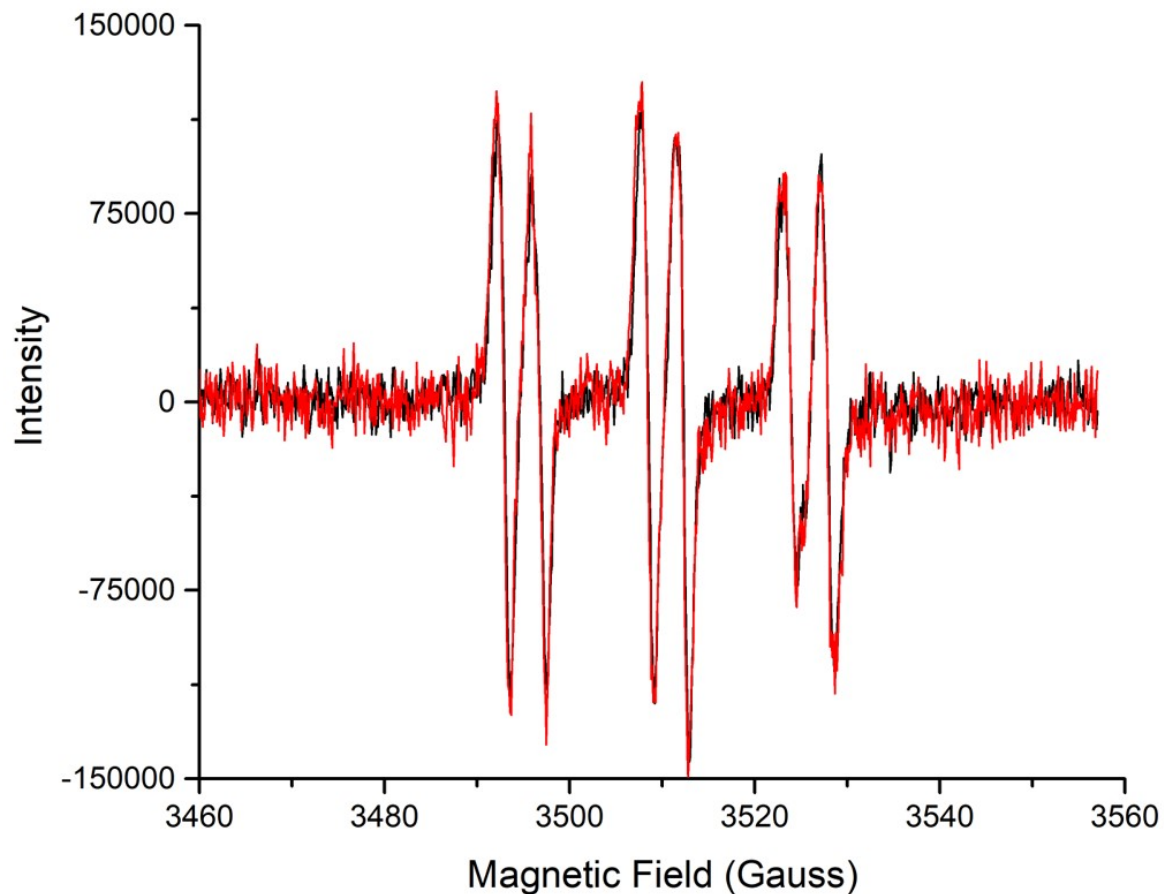

**Figure S5.** EPR spectra of the PBN-R• adduct arising from the photolysis of AAPH in the presence (red spectrum) or absence (black spectrum) of 100 μM CB[6]. Solutions containing 200 mM PBN and 100 μM of AAPH (prepared in 10 mM phosphate buffer, pH 7.4) were irradiated at 365 nm for 5 min. At defined times, aliquots were removed and immediately analyzed by EPR spectroscopy with a single recorded.

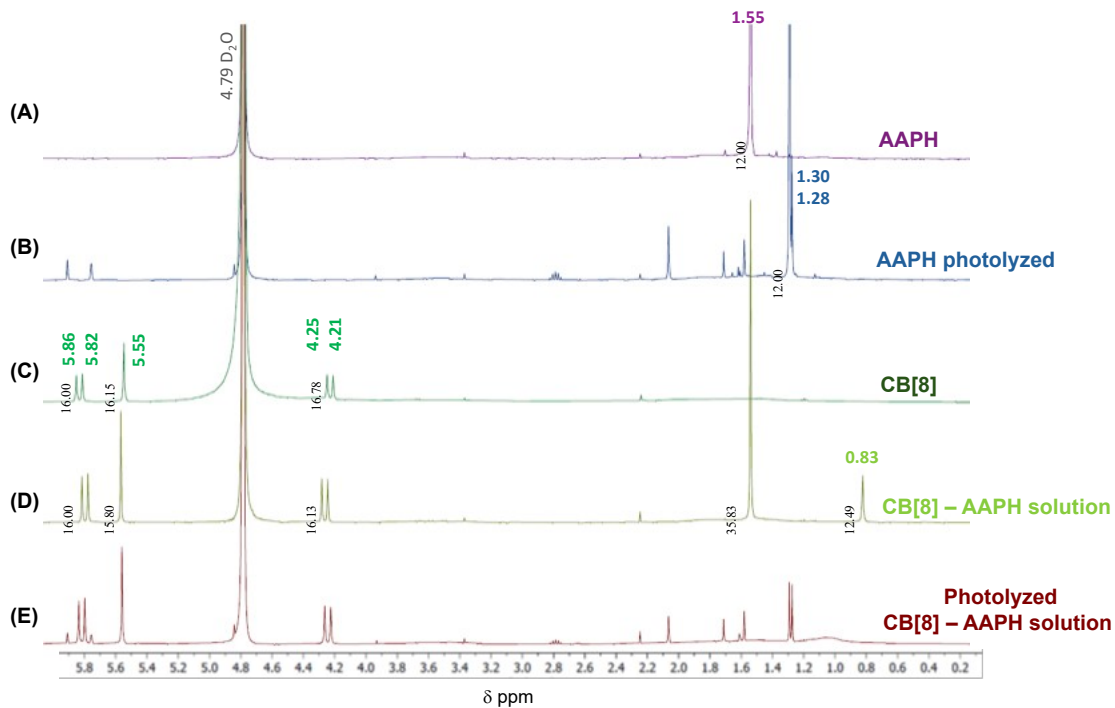

**Figure S6.**  $^1\text{H-NMR}$  spectra of non-illuminated (panel A) and illuminated (panel B) solutions of AAPH and the respective mixture with CB[8] (2:1, AAPH:CB[8]), panels D and E. Panel C shows  $^1\text{H-NMR}$  spectrum of a non-illuminated CB[8] solution. All solutions were prepared in  $\text{D}_2\text{O}$ . Illuminated solutions correspond to solutions exposed to light (365 nm) for 12 minutes

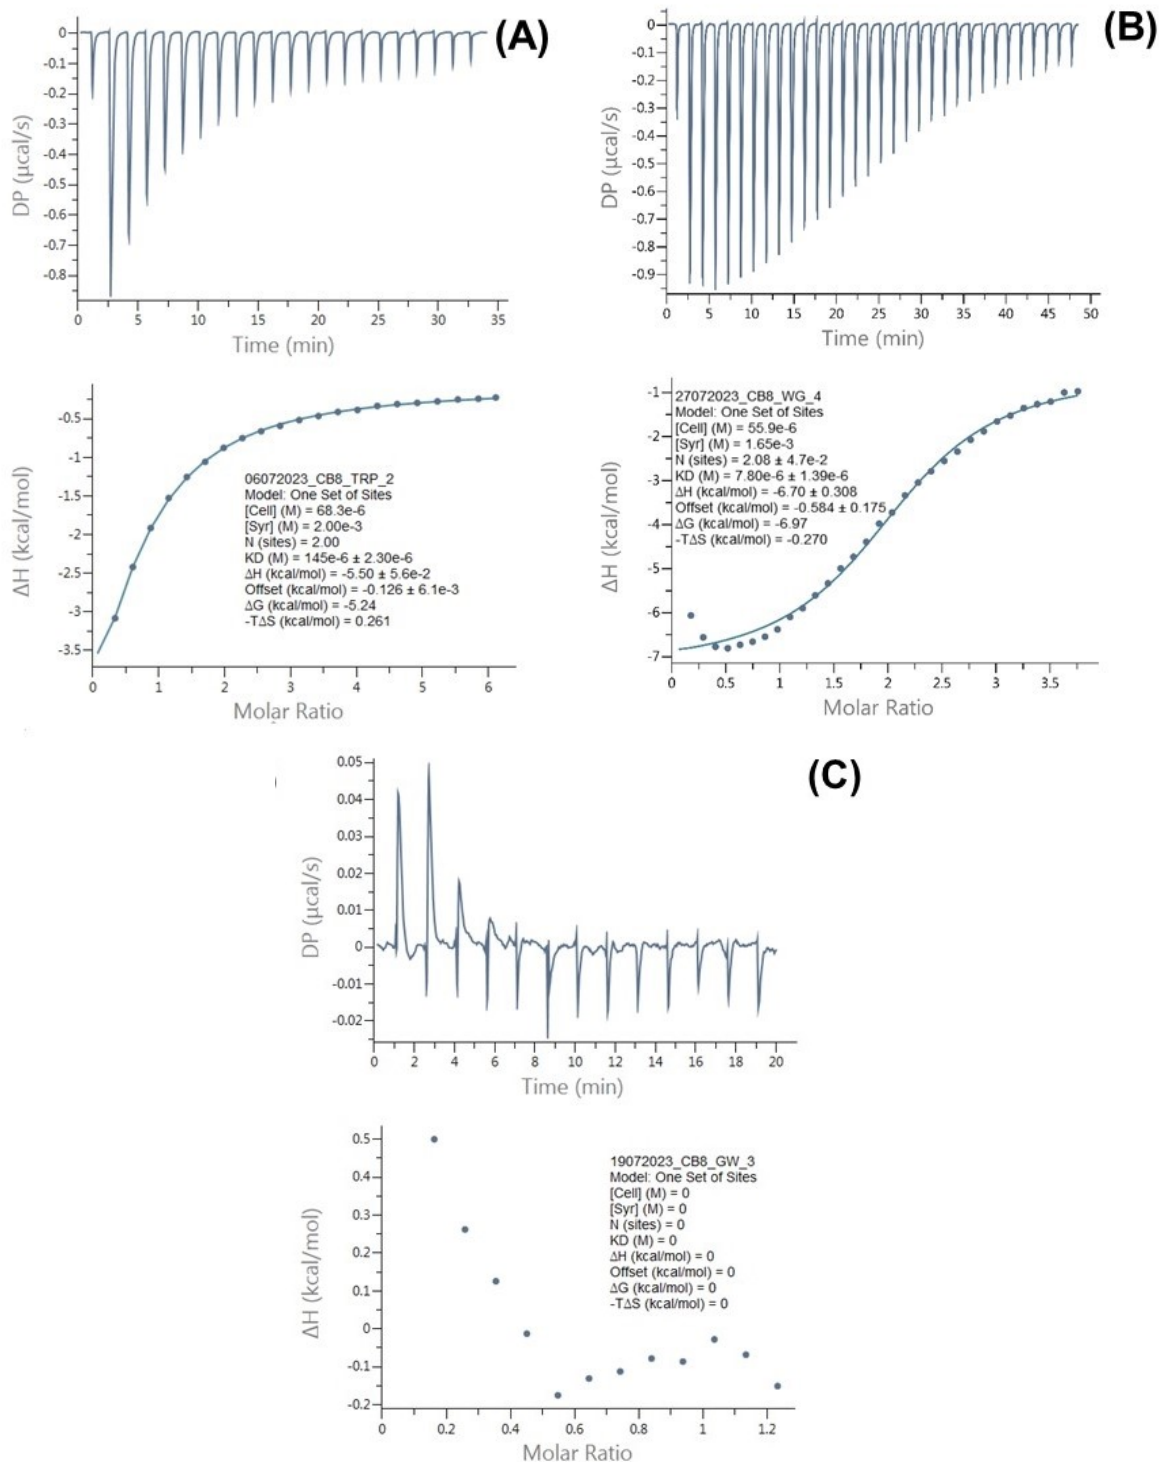

**Figure S7.** Representative results of isothermal titrating calorimetry (ITC) for the binding of free Trp, Trp-Gly, and Gly-Trp with CB[8] in 10 mM phosphate buffer (pH 7.4) at 25 °C. Each panel presents the exothermic heat flow detected from consecutive injections of aliquots (2  $\mu\text{L}$ ) of a peptide solution ( $\sim 2$  mM) into CB[8] ( $\sim 60$ -70 mM), and the corresponding integrated heat data plotted against the molar ratio of titrant and titrated species together with their thermodynamic data. Controls consisted of successive injections of a buffer solution into a CB[8] solution alone giving heat flows accounting for dilution effects. Panels, A, B, and C correspond to Trp, Trp-Gly, and Gly-Trp respectively.



**Table S1:** Geometries in cartesian coordinates of the stationary points and computed energies (hartree).

**AAPH-CB[6] in the gas phase**

Total Energy = -4256.99309822

Total and zero-point Energy= -4255.853354

Total and thermal Energy= -4255.784640

Total Energy and thermal Enthalpies= -4255.783696

Total and thermal Free Energy= -4255.951406

2 1

|   |                 |                 |                 |
|---|-----------------|-----------------|-----------------|
| O | 12.420072000000 | 9.312107000000  | 20.494264000000 |
| O | 9.966833000000  | 14.907990000000 | 20.717250000000 |
| O | 10.682493000000 | 9.430280000000  | 17.488011000000 |
| O | 7.290680000000  | 14.429330000000 | 18.534610000000 |
| O | 11.590289000000 | 10.708014000000 | 14.029713000000 |
| O | 8.483705000000  | 15.730730000000 | 15.692440000000 |
| N | 12.364694000000 | 11.167951000000 | 21.884327000000 |
| N | 10.482554000000 | 10.537111000000 | 20.857852000000 |
| N | 11.467544000000 | 13.468591000000 | 21.753017000000 |
| N | 9.427354000000  | 12.718992000000 | 21.199938000000 |
| N | 9.038381000000  | 10.194621000000 | 18.931376000000 |
| N | 8.862842000000  | 10.669896000000 | 16.750512000000 |
| N | 7.919512000000  | 12.347539000000 | 19.316665000000 |
| N | 7.359168000000  | 12.565822000000 | 17.169334000000 |
| N | 9.517237000000  | 11.582658000000 | 14.604026000000 |
| N | 10.763697000000 | 12.659623000000 | 13.089967000000 |
| N | 8.105870000000  | 13.540988000000 | 15.046325000000 |
| N | 9.726093000000  | 14.689455000000 | 14.029048000000 |
| C | 11.833435000000 | 10.230273000000 | 20.995875000000 |
| C | 10.259575000000 | 13.807643000000 | 21.162657000000 |
| C | 11.401676000000 | 12.120239000000 | 22.341160000000 |
| H | 11.418078000000 | 12.205465000000 | 23.433536000000 |
| C | 10.055632000000 | 11.554776000000 | 21.785725000000 |
| H | 9.406713000000  | 11.136038000000 | 22.563219000000 |
| C | 9.596929000000  | 9.643149000000  | 20.142795000000 |
| H | 10.200800000000 | 8.778858000000  | 19.864198000000 |
| H | 8.775113000000  | 9.325582000000  | 20.793200000000 |
| C | 8.067003000000  | 12.741044000000 | 20.697536000000 |
| H | 7.468195000000  | 12.085902000000 | 21.337280000000 |
| H | 7.691713000000  | 13.760178000000 | 20.775832000000 |
| C | 9.666900000000  | 10.034941000000 | 17.698804000000 |
| C | 7.513923000000  | 13.245999000000 | 18.355111000000 |
| C | 7.836662000000  | 10.966361000000 | 18.847787000000 |
| H | 7.006434000000  | 10.455836000000 | 19.347839000000 |
| C | 7.621451000000  | 11.143537000000 | 17.307771000000 |
| H | 6.770810000000  | 10.571535000000 | 16.920477000000 |
| C | 9.065155000000  | 10.425324000000 | 15.341944000000 |
| H | 9.849812000000  | 9.672307000000  | 15.253085000000 |
| H | 8.134388000000  | 10.044802000000 | 14.901321000000 |
| C | 7.004787000000  | 13.244982000000 | 15.943443000000 |
| H | 6.544382000000  | 14.190348000000 | 16.225094000000 |
| H | 6.278800000000  | 12.636841000000 | 15.398045000000 |
| C | 10.740038000000 | 11.549630000000 | 13.934289000000 |
| C | 8.754074000000  | 14.753406000000 | 15.006681000000 |
| C | 8.637932000000  | 12.599419000000 | 14.080242000000 |

|   |                 |                 |                 |
|---|-----------------|-----------------|-----------------|
| H | 7.815163000000  | 12.157603000000 | 13.506453000000 |
| C | 9.596719000000  | 13.473082000000 | 13.217100000000 |
| H | 9.188484000000  | 13.733166000000 | 12.234176000000 |
| C | 13.776846000000 | 11.213644000000 | 22.155144000000 |
| H | 13.944303000000 | 11.360735000000 | 23.226097000000 |
| H | 14.178507000000 | 10.248099000000 | 21.846960000000 |
| C | 12.361750000000 | 14.495573000000 | 22.270638000000 |
| H | 11.892365000000 | 15.465656000000 | 22.115877000000 |
| H | 12.489211000000 | 14.325044000000 | 23.347683000000 |
| O | 11.946886000000 | 17.381144000000 | 15.508605000000 |
| O | 14.475127000000 | 12.168734000000 | 13.247013000000 |
| O | 14.651886000000 | 17.922491000000 | 18.107351000000 |
| O | 16.144780000000 | 12.250870000000 | 16.203609000000 |
| O | 13.670450000000 | 16.824868000000 | 21.114313000000 |
| O | 15.141172000000 | 10.934456000000 | 19.626223000000 |
| N | 11.874839000000 | 15.824875000000 | 13.791532000000 |
| N | 13.862212000000 | 16.495235000000 | 14.558471000000 |
| N | 12.890539000000 | 13.806739000000 | 12.813666000000 |
| N | 14.846140000000 | 14.411209000000 | 13.708965000000 |
| N | 15.475461000000 | 16.596262000000 | 16.389456000000 |
| N | 16.204223000000 | 16.248368000000 | 18.470848000000 |
| N | 16.407154000000 | 14.464975000000 | 15.567289000000 |
| N | 16.595255000000 | 13.938417000000 | 17.732272000000 |
| N | 15.475735000000 | 15.440678000000 | 20.676831000000 |
| N | 13.662894000000 | 14.552655000000 | 21.629966000000 |
| N | 15.842704000000 | 13.135005000000 | 19.881527000000 |
| N | 14.498446000000 | 12.238518000000 | 21.432592000000 |
| C | 12.498659000000 | 16.636138000000 | 14.715340000000 |
| C | 14.109560000000 | 13.310695000000 | 13.271089000000 |
| C | 12.817090000000 | 15.237242000000 | 12.843911000000 |
| H | 12.619388000000 | 15.639000000000 | 11.843009000000 |
| C | 14.209995000000 | 15.663793000000 | 13.416608000000 |
| H | 14.806858000000 | 16.251138000000 | 12.708310000000 |
| C | 14.811697000000 | 17.289833000000 | 15.302096000000 |
| H | 14.262841000000 | 18.118291000000 | 15.746148000000 |
| H | 15.563210000000 | 17.676829000000 | 14.604195000000 |
| C | 16.210529000000 | 14.261709000000 | 14.150172000000 |
| H | 16.861062000000 | 14.953622000000 | 13.605173000000 |
| H | 16.494644000000 | 13.233253000000 | 13.924827000000 |
| C | 15.353002000000 | 17.011019000000 | 17.697686000000 |
| C | 16.339884000000 | 13.404563000000 | 16.468731000000 |
| C | 16.638536000000 | 15.719951000000 | 16.207218000000 |
| H | 17.436927000000 | 16.275816000000 | 15.702722000000 |
| C | 16.989642000000 | 15.320322000000 | 17.675696000000 |
| H | 18.052627000000 | 15.440563000000 | 17.916239000000 |
| C | 16.275113000000 | 16.373538000000 | 19.911886000000 |
| H | 15.930429000000 | 17.374557000000 | 20.159384000000 |
| H | 17.319203000000 | 16.262386000000 | 20.216085000000 |
| C | 16.856517000000 | 13.071245000000 | 18.853506000000 |
| H | 16.859987000000 | 12.047870000000 | 18.474337000000 |
| H | 17.838401000000 | 13.309784000000 | 19.283863000000 |
| C | 14.199063000000 | 15.721534000000 | 21.128292000000 |
| C | 15.144956000000 | 11.972294000000 | 20.226951000000 |
| C | 15.873594000000 | 14.078191000000 | 20.973026000000 |
| H | 16.853683000000 | 14.082100000000 | 21.465536000000 |
| C | 14.725791000000 | 13.567713000000 | 21.889865000000 |

|   |                 |                 |                 |
|---|-----------------|-----------------|-----------------|
| H | 14.978677000000 | 13.578768000000 | 22.956261000000 |
| C | 10.444394000000 | 15.861724000000 | 13.575116000000 |
| H | 10.257184000000 | 16.003594000000 | 12.504042000000 |
| H | 10.052876000000 | 16.716467000000 | 14.122183000000 |
| C | 11.896136000000 | 12.932831000000 | 12.237250000000 |
| H | 12.394910000000 | 11.981989000000 | 12.047647000000 |
| H | 11.533885000000 | 13.356304000000 | 11.295417000000 |
| N | 11.462915000000 | 19.030823000000 | 18.442965000000 |
| N | 12.358873000000 | 19.402482000000 | 19.189010000000 |
| C | 10.821951000000 | 17.781420000000 | 18.956867000000 |
| C | 13.034019000000 | 20.666547000000 | 18.820299000000 |
| C | 11.793643000000 | 16.609341000000 | 18.685782000000 |
| H | 12.737555000000 | 16.841406000000 | 19.160590000000 |
| H | 11.381916000000 | 15.696601000000 | 19.108097000000 |
| H | 11.946902000000 | 16.498608000000 | 17.614314000000 |
| C | 10.454416000000 | 17.961233000000 | 20.436147000000 |
| H | 9.829543000000  | 18.847942000000 | 20.565532000000 |
| H | 9.930662000000  | 17.093789000000 | 20.822150000000 |
| H | 11.369812000000 | 18.077021000000 | 21.010560000000 |
| C | 12.085302000000 | 21.814468000000 | 19.229021000000 |
| H | 11.795219000000 | 21.731255000000 | 20.277701000000 |
| H | 12.540126000000 | 22.792470000000 | 19.065520000000 |
| H | 11.189320000000 | 21.742721000000 | 18.612268000000 |
| C | 13.423826000000 | 20.739646000000 | 17.339104000000 |
| H | 13.819197000000 | 21.723080000000 | 17.077256000000 |
| H | 14.155204000000 | 19.968076000000 | 17.110247000000 |
| H | 12.528515000000 | 20.563954000000 | 16.744670000000 |
| C | 9.616076000000  | 17.490849000000 | 18.089294000000 |
| C | 14.270253000000 | 20.698934000000 | 19.719927000000 |
| N | 8.774053000000  | 16.578917000000 | 18.502838000000 |
| N | 9.482986000000  | 18.084384000000 | 16.918448000000 |
| N | 14.479466000000 | 19.728773000000 | 20.572966000000 |
| N | 15.083753000000 | 21.741352000000 | 19.631078000000 |
| H | 10.272229000000 | 18.622537000000 | 16.590608000000 |
| H | 8.909105000000  | 17.615537000000 | 16.223889000000 |
| H | 8.961873000000  | 16.040847000000 | 19.343032000000 |
| H | 8.088416000000  | 16.160256000000 | 17.882192000000 |
| H | 15.905633000000 | 21.840313000000 | 20.209147000000 |
| H | 14.883951000000 | 22.490842000000 | 18.988081000000 |
| H | 15.272692000000 | 19.732087000000 | 21.198255000000 |
| H | 13.888312000000 | 18.893291000000 | 20.540426000000 |

### AAPH-CB[6] in PCM model

Total Energy= -4257.23849981

Total and zero-point Energy= -4256.096461

Total and thermal Energy= -4256.028133

Total Energy and thermal Enthalpies= -4256.027189

Total and thermal Free Energy= -4256.193309

2 1

|   |                 |                 |                 |
|---|-----------------|-----------------|-----------------|
| O | 12.452987000000 | 9.349490000000  | 20.304683000000 |
| O | 9.930556000000  | 14.896157000000 | 20.777968000000 |
| O | 10.589475000000 | 9.389287000000  | 17.356027000000 |
| O | 7.239734000000  | 14.423263000000 | 18.553344000000 |
| O | 11.483897000000 | 10.631903000000 | 14.065074000000 |
| O | 8.481769000000  | 15.731558000000 | 15.702912000000 |
| N | 12.392599000000 | 11.163842000000 | 21.744700000000 |

|   |                 |                 |                 |
|---|-----------------|-----------------|-----------------|
| N | 10.498341000000 | 10.497200000000 | 20.785946000000 |
| N | 11.453285000000 | 13.440425000000 | 21.757527000000 |
| N | 9.438304000000  | 12.673386000000 | 21.145586000000 |
| N | 9.040065000000  | 10.221265000000 | 18.863713000000 |
| N | 8.741423000000  | 10.618830000000 | 16.690210000000 |
| N | 7.872038000000  | 12.333169000000 | 19.311885000000 |
| N | 7.338118000000  | 12.579518000000 | 17.162319000000 |
| N | 9.408669000000  | 11.540696000000 | 14.553169000000 |
| N | 10.760524000000 | 12.641092000000 | 13.165126000000 |
| N | 8.088613000000  | 13.548136000000 | 15.048987000000 |
| N | 9.713218000000  | 14.689585000000 | 14.031810000000 |
| C | 11.852359000000 | 10.244331000000 | 20.866632000000 |
| C | 10.246569000000 | 13.782345000000 | 21.173810000000 |
| C | 11.413545000000 | 12.073515000000 | 22.281540000000 |
| H | 11.461975000000 | 12.094127000000 | 23.372893000000 |
| C | 10.068389000000 | 11.511635000000 | 21.728256000000 |
| H | 9.424823000000  | 11.077030000000 | 22.496938000000 |
| C | 9.605018000000  | 9.628354000000  | 20.054511000000 |
| H | 10.192679000000 | 8.764778000000  | 19.749272000000 |
| H | 8.787808000000  | 9.304083000000  | 20.703161000000 |
| C | 8.060863000000  | 12.709966000000 | 20.694242000000 |
| H | 7.474430000000  | 12.055413000000 | 21.342461000000 |
| H | 7.700129000000  | 13.731649000000 | 20.792877000000 |
| C | 9.580263000000  | 10.018042000000 | 17.609524000000 |
| C | 7.474202000000  | 13.241095000000 | 18.359265000000 |
| C | 7.805106000000  | 10.963398000000 | 18.825350000000 |
| H | 7.013088000000  | 10.418005000000 | 19.343865000000 |
| C | 7.539195000000  | 11.149633000000 | 17.296920000000 |
| H | 6.658601000000  | 10.611269000000 | 16.938150000000 |
| C | 8.892608000000  | 10.398664000000 | 15.270845000000 |
| H | 9.609339000000  | 9.590133000000  | 15.139700000000 |
| H | 7.927078000000  | 10.105887000000 | 14.847725000000 |
| C | 6.979883000000  | 13.266366000000 | 15.939872000000 |
| H | 6.535371000000  | 14.216973000000 | 16.226500000000 |
| H | 6.244113000000  | 12.671207000000 | 15.396063000000 |
| C | 10.652349000000 | 11.511271000000 | 13.952644000000 |
| C | 8.745451000000  | 14.756697000000 | 15.009896000000 |
| C | 8.580914000000  | 12.621337000000 | 14.053373000000 |
| H | 7.750425000000  | 12.229247000000 | 13.461453000000 |
| C | 9.588624000000  | 13.475155000000 | 13.229816000000 |
| H | 9.235444000000  | 13.724324000000 | 12.226164000000 |
| C | 13.801700000000 | 11.202112000000 | 22.045472000000 |
| H | 13.938855000000 | 11.319381000000 | 23.122490000000 |
| H | 14.217444000000 | 10.249833000000 | 21.722836000000 |
| C | 12.350108000000 | 14.451743000000 | 22.305547000000 |
| H | 11.875297000000 | 15.423820000000 | 22.189326000000 |
| H | 12.490392000000 | 14.241971000000 | 23.371103000000 |
| O | 11.944839000000 | 17.362444000000 | 15.513962000000 |
| O | 14.449288000000 | 12.112994000000 | 13.414116000000 |
| O | 14.573237000000 | 17.925911000000 | 18.087759000000 |
| O | 16.299961000000 | 12.260191000000 | 16.341440000000 |
| O | 13.585399000000 | 16.806157000000 | 21.161863000000 |
| O | 15.316074000000 | 10.991340000000 | 19.595324000000 |
| N | 11.882961000000 | 15.777958000000 | 13.825986000000 |
| N | 13.868892000000 | 16.479798000000 | 14.574528000000 |
| N | 12.904168000000 | 13.754003000000 | 12.879336000000 |

|   |                 |                 |                 |
|---|-----------------|-----------------|-----------------|
| N | 14.839285000000 | 14.365489000000 | 13.795111000000 |
| N | 15.480620000000 | 16.628139000000 | 16.396459000000 |
| N | 16.139373000000 | 16.275977000000 | 18.501462000000 |
| N | 16.395107000000 | 14.471419000000 | 15.655945000000 |
| N | 16.747871000000 | 14.000844000000 | 17.802552000000 |
| N | 15.428191000000 | 15.479538000000 | 20.702275000000 |
| N | 13.638716000000 | 14.530590000000 | 21.644696000000 |
| N | 15.957169000000 | 13.193714000000 | 19.938127000000 |
| N | 14.531749000000 | 12.252936000000 | 21.373308000000 |
| C | 12.506103000000 | 16.612885000000 | 14.733029000000 |
| C | 14.098220000000 | 13.276391000000 | 13.381901000000 |
| C | 12.827448000000 | 15.194617000000 | 12.885318000000 |
| H | 12.633853000000 | 15.571875000000 | 11.877811000000 |
| C | 14.214814000000 | 15.626470000000 | 13.456465000000 |
| H | 14.829974000000 | 16.176906000000 | 12.739652000000 |
| C | 14.821849000000 | 17.299065000000 | 15.294141000000 |
| H | 14.275242000000 | 18.139250000000 | 15.715862000000 |
| H | 15.569689000000 | 17.668298000000 | 14.587386000000 |
| C | 16.205549000000 | 14.231971000000 | 14.244632000000 |
| H | 16.846189000000 | 14.917488000000 | 13.684644000000 |
| H | 16.503120000000 | 13.205105000000 | 14.041649000000 |
| C | 15.307086000000 | 17.032848000000 | 17.703577000000 |
| C | 16.448461000000 | 13.444246000000 | 16.576449000000 |
| C | 16.642343000000 | 15.762748000000 | 16.246882000000 |
| H | 17.435155000000 | 16.285550000000 | 15.705928000000 |
| C | 17.014503000000 | 15.421076000000 | 17.725034000000 |
| H | 18.058669000000 | 15.628787000000 | 17.972288000000 |
| C | 16.198229000000 | 16.443697000000 | 19.940943000000 |
| H | 15.797492000000 | 17.427905000000 | 20.164400000000 |
| H | 17.240137000000 | 16.398443000000 | 20.261846000000 |
| C | 17.023495000000 | 13.189352000000 | 18.960158000000 |
| H | 17.139300000000 | 12.163104000000 | 18.616648000000 |
| H | 17.953092000000 | 13.526103000000 | 19.428563000000 |
| C | 14.148393000000 | 15.722848000000 | 21.159497000000 |
| C | 15.262360000000 | 12.030979000000 | 20.222089000000 |
| C | 15.881035000000 | 14.147113000000 | 21.031838000000 |
| H | 16.836121000000 | 14.195134000000 | 21.561936000000 |
| C | 14.720354000000 | 13.577453000000 | 21.895870000000 |
| H | 14.947474000000 | 13.540833000000 | 22.964823000000 |
| C | 10.456915000000 | 15.851269000000 | 13.584067000000 |
| H | 10.285100000000 | 15.995787000000 | 12.512860000000 |
| H | 10.076434000000 | 16.712470000000 | 14.128052000000 |
| C | 11.903833000000 | 12.881398000000 | 12.313804000000 |
| H | 12.385897000000 | 11.921927000000 | 12.137605000000 |
| H | 11.553817000000 | 13.296452000000 | 11.366246000000 |
| N | 11.481842000000 | 19.022655000000 | 18.443098000000 |
| N | 12.362670000000 | 19.422694000000 | 19.192763000000 |
| C | 10.835066000000 | 17.785772000000 | 18.975650000000 |
| C | 13.049122000000 | 20.670361000000 | 18.790904000000 |
| C | 11.797807000000 | 16.602428000000 | 18.718928000000 |
| H | 12.756264000000 | 16.852784000000 | 19.152104000000 |
| H | 11.401603000000 | 15.706043000000 | 19.189049000000 |
| H | 11.916316000000 | 16.449008000000 | 17.647818000000 |
| C | 10.462837000000 | 17.976812000000 | 20.451088000000 |
| H | 9.839854000000  | 18.866477000000 | 20.568208000000 |
| H | 9.938441000000  | 17.110508000000 | 20.840456000000 |

|   |                 |                 |                 |
|---|-----------------|-----------------|-----------------|
| H | 11.377605000000 | 18.098319000000 | 21.024694000000 |
| C | 12.152039000000 | 21.826358000000 | 19.287928000000 |
| H | 11.922564000000 | 21.710785000000 | 20.348102000000 |
| H | 12.636065000000 | 22.790398000000 | 19.133313000000 |
| H | 11.222053000000 | 21.800176000000 | 18.719366000000 |
| C | 13.327133000000 | 20.766988000000 | 17.288459000000 |
| H | 13.722929000000 | 21.747442000000 | 17.020736000000 |
| H | 14.028830000000 | 19.992097000000 | 16.988785000000 |
| H | 12.389016000000 | 20.625633000000 | 16.754629000000 |
| C | 9.633337000000  | 17.487283000000 | 18.106658000000 |
| C | 14.341187000000 | 20.679533000000 | 19.609373000000 |
| N | 8.818424000000  | 16.538717000000 | 18.501093000000 |
| N | 9.477159000000  | 18.109342000000 | 16.955976000000 |
| N | 14.524614000000 | 19.775354000000 | 20.540487000000 |
| N | 15.215501000000 | 21.640803000000 | 19.384994000000 |
| H | 10.237848000000 | 18.702003000000 | 16.653513000000 |
| H | 8.903916000000  | 17.663289000000 | 16.247458000000 |
| H | 9.029189000000  | 15.988628000000 | 19.328506000000 |
| H | 8.148344000000  | 16.116955000000 | 17.866879000000 |
| H | 16.077605000000 | 21.716000000000 | 19.906091000000 |
| H | 15.045456000000 | 22.341149000000 | 18.680786000000 |
| H | 15.352302000000 | 19.773221000000 | 21.120048000000 |
| H | 13.883706000000 | 18.985802000000 | 20.594817000000 |

### AAPH@CB[8] in the gas phase

Total Energy= -5460.98676976

Total and zero-point Energy= -5459.568690

Total and thermal Energy= -5459.482413

Total Energy and thermal Enthalpies= -5459.481469

Total and thermal Free Energy= -5459.688870

2 1

|   |                 |                 |                 |
|---|-----------------|-----------------|-----------------|
| O | 13.173714000000 | 22.987695000000 | 19.346346000000 |
| O | 15.762050000000 | 22.486940000000 | 21.399060000000 |
| O | 16.597156000000 | 24.095028000000 | 24.866119000000 |
| O | 15.308459000000 | 26.470960000000 | 27.598304000000 |
| O | 16.042738000000 | 27.632830000000 | 16.982054000000 |
| O | 19.167297000000 | 26.810937000000 | 19.026633000000 |
| O | 19.907930000000 | 28.082873000000 | 21.980068000000 |
| O | 17.881986000000 | 30.641313000000 | 24.220689000000 |
| N | 13.115581000000 | 24.523934000000 | 17.609686000000 |
| N | 14.972681000000 | 23.320054000000 | 17.920133000000 |
| N | 16.870289000000 | 22.881499000000 | 19.400395000000 |
| N | 17.916530000000 | 23.346111000000 | 21.322998000000 |
| N | 18.462942000000 | 24.283962000000 | 23.496516000000 |
| N | 18.368097000000 | 25.502539000000 | 25.371941000000 |
| N | 17.427570000000 | 27.133289000000 | 26.929298000000 |
| N | 16.002607000000 | 28.682511000000 | 27.675986000000 |
| N | 14.284400000000 | 26.262221000000 | 16.364617000000 |
| N | 16.149325000000 | 25.323722000000 | 17.150513000000 |
| N | 18.081095000000 | 24.824196000000 | 18.534098000000 |
| N | 19.497187000000 | 24.873015000000 | 20.249375000000 |
| N | 20.044661000000 | 25.816252000000 | 22.438502000000 |
| N | 19.542022000000 | 27.212584000000 | 24.094928000000 |
| N | 18.476106000000 | 28.837396000000 | 25.545399000000 |
| N | 17.152030000000 | 30.413715000000 | 26.409052000000 |
| C | 13.698473000000 | 23.548819000000 | 18.418996000000 |

|   |                 |                 |                 |
|---|-----------------|-----------------|-----------------|
| C | 15.857808000000 | 22.348958000000 | 18.519039000000 |
| H | 16.349156000000 | 21.779647000000 | 17.724608000000 |
| H | 15.231761000000 | 21.686109000000 | 19.116120000000 |
| C | 16.722009000000 | 22.870328000000 | 20.782007000000 |
| C | 18.214608000000 | 23.095161000000 | 22.713525000000 |
| C | 17.670842000000 | 24.577248000000 | 24.603694000000 |
| C | 17.981294000000 | 25.814609000000 | 26.728162000000 |
| C | 16.142590000000 | 27.323427000000 | 27.412938000000 |
| C | 14.911615000000 | 29.170432000000 | 28.483507000000 |
| C | 13.942799000000 | 24.862676000000 | 16.470583000000 |
| H | 13.498806000000 | 24.504252000000 | 15.535212000000 |
| C | 15.303691000000 | 24.183997000000 | 16.821683000000 |
| H | 15.740438000000 | 23.615374000000 | 15.993655000000 |
| C | 18.124912000000 | 23.437788000000 | 18.983688000000 |
| H | 18.600928000000 | 22.807609000000 | 18.224627000000 |
| C | 18.935354000000 | 23.543438000000 | 20.312138000000 |
| H | 19.732479000000 | 22.797302000000 | 20.402612000000 |
| C | 19.753743000000 | 24.935091000000 | 23.547873000000 |
| C | 19.596596000000 | 25.915337000000 | 24.751413000000 |
| C | 18.197519000000 | 28.349379000000 | 26.880264000000 |
| C | 17.222682000000 | 29.424273000000 | 27.459004000000 |
| C | 15.540896000000 | 26.529327000000 | 16.855731000000 |
| C | 17.588576000000 | 25.226778000000 | 17.240704000000 |
| H | 17.940894000000 | 24.515842000000 | 16.482345000000 |
| H | 18.001882000000 | 26.212941000000 | 17.031685000000 |
| C | 18.931425000000 | 25.637514000000 | 19.252833000000 |
| C | 20.506848000000 | 25.393301000000 | 21.137216000000 |
| H | 21.277641000000 | 24.629879000000 | 21.274702000000 |
| H | 20.938680000000 | 26.267900000000 | 20.652481000000 |
| C | 19.829699000000 | 27.139528000000 | 22.748850000000 |
| C | 19.656958000000 | 28.458033000000 | 24.810399000000 |
| C | 17.828639000000 | 30.031797000000 | 25.271195000000 |
| C | 16.689305000000 | 31.766038000000 | 26.609405000000 |
| O | 15.198385000000 | 33.457182000000 | 24.881987000000 |
| O | 12.609942000000 | 33.958223000000 | 22.829397000000 |
| O | 11.774773000000 | 32.350272000000 | 19.362392000000 |
| O | 13.063666000000 | 29.974192000000 | 16.630356000000 |
| O | 12.329397000000 | 28.812270000000 | 27.246717000000 |
| O | 9.205041000000  | 29.634096000000 | 25.201889000000 |
| O | 8.464361000000  | 28.362171000000 | 22.248600000000 |
| O | 10.490305000000 | 25.803737000000 | 20.007903000000 |
| N | 15.256567000000 | 31.921091000000 | 26.618779000000 |
| N | 13.399461000000 | 33.124956000000 | 26.308289000000 |
| N | 11.501807000000 | 33.563638000000 | 24.828114000000 |
| N | 10.455476000000 | 33.099024000000 | 22.905561000000 |
| N | 9.909036000000  | 32.161186000000 | 20.732041000000 |
| N | 10.003983000000 | 30.942536000000 | 18.856670000000 |
| N | 10.944554000000 | 29.311812000000 | 17.299312000000 |
| N | 12.369568000000 | 27.762625000000 | 16.552651000000 |
| N | 14.087771000000 | 30.182907000000 | 27.864002000000 |
| N | 12.222829000000 | 31.121367000000 | 27.078104000000 |
| N | 10.291099000000 | 31.620897000000 | 25.694460000000 |
| N | 8.874931000000  | 31.572047000000 | 23.979244000000 |
| N | 8.327465000000  | 30.628774000000 | 21.790123000000 |
| N | 8.830166000000  | 29.232441000000 | 20.133716000000 |
| N | 9.896118000000  | 27.607662000000 | 18.683237000000 |

|   |                 |                 |                 |
|---|-----------------|-----------------|-----------------|
| N | 11.220166000000 | 26.031358000000 | 17.819507000000 |
| C | 14.673650000000 | 32.896143000000 | 25.809404000000 |
| C | 12.514361000000 | 34.096105000000 | 25.709429000000 |
| C | 11.650020000000 | 33.574818000000 | 23.446494000000 |
| C | 10.157311000000 | 33.349986000000 | 21.515051000000 |
| C | 10.701151000000 | 31.867940000000 | 19.624862000000 |
| C | 10.390789000000 | 30.630475000000 | 17.500447000000 |
| C | 12.229552000000 | 29.121707000000 | 16.815703000000 |
| C | 13.460578000000 | 27.274734000000 | 15.745139000000 |
| H | 14.097496000000 | 28.132391000000 | 15.530113000000 |
| H | 13.069070000000 | 26.862326000000 | 14.807496000000 |
| C | 14.429375000000 | 31.582438000000 | 27.757928000000 |
| C | 13.068483000000 | 32.261105000000 | 27.406820000000 |
| C | 10.247220000000 | 33.007306000000 | 25.244885000000 |
| C | 9.436713000000  | 32.901648000000 | 23.916474000000 |
| C | 8.618295000000  | 31.509936000000 | 20.680726000000 |
| C | 8.775510000000  | 30.529674000000 | 19.477206000000 |
| C | 10.174647000000 | 28.095698000000 | 17.348365000000 |
| H | 9.244105000000  | 28.197112000000 | 16.778140000000 |
| C | 11.149501000000 | 27.020837000000 | 16.769593000000 |
| H | 10.798716000000 | 26.563635000000 | 15.837333000000 |
| C | 12.831252000000 | 29.915776000000 | 27.372952000000 |
| C | 10.783588000000 | 31.218330000000 | 26.987877000000 |
| C | 9.440800000000  | 30.807547000000 | 24.975725000000 |
| C | 7.865281000000  | 31.051711000000 | 23.091417000000 |
| C | 8.542513000000  | 29.305505000000 | 21.479797000000 |
| C | 8.715270000000  | 27.986972000000 | 19.418268000000 |
| H | 7.872749000000  | 28.051608000000 | 18.716308000000 |
| H | 8.511540000000  | 27.210030000000 | 20.153778000000 |
| C | 10.543602000000 | 26.413258000000 | 18.957401000000 |
| C | 11.682848000000 | 24.679029000000 | 17.619085000000 |
| H | 11.310181000000 | 24.073749000000 | 18.445378000000 |
| H | 11.261506000000 | 24.311535000000 | 16.673766000000 |
| H | 19.085713000000 | 22.429703000000 | 22.786735000000 |
| H | 17.340386000000 | 22.603670000000 | 23.141722000000 |
| H | 20.559482000000 | 24.203750000000 | 23.673494000000 |
| H | 20.428635000000 | 25.879310000000 | 25.463286000000 |
| H | 19.128040000000 | 28.247935000000 | 27.450517000000 |
| H | 17.573478000000 | 29.881504000000 | 28.391244000000 |
| H | 14.873399000000 | 31.940924000000 | 28.693260000000 |
| H | 12.631771000000 | 32.829804000000 | 28.234814000000 |
| H | 9.771224000000  | 33.637465000000 | 26.003976000000 |
| H | 8.639556000000  | 33.647756000000 | 23.826054000000 |
| H | 7.812487000000  | 32.241200000000 | 20.555097000000 |
| H | 7.943467000000  | 30.565632000000 | 18.765334000000 |
| H | 19.860754000000 | 29.234975000000 | 24.074907000000 |
| H | 20.499450000000 | 28.393345000000 | 25.512389000000 |
| H | 17.061970000000 | 32.371284000000 | 25.783086000000 |
| H | 17.110620000000 | 32.133591000000 | 27.554713000000 |
| H | 13.140414000000 | 34.758925000000 | 25.112320000000 |
| H | 12.023083000000 | 34.665437000000 | 26.503889000000 |
| H | 11.031474000000 | 33.841554000000 | 21.086821000000 |
| H | 9.286151000000  | 34.015377000000 | 21.441904000000 |
| H | 11.166444000000 | 31.339829000000 | 17.211603000000 |
| H | 9.514873000000  | 30.755582000000 | 16.852741000000 |
| H | 18.857206000000 | 25.689468000000 | 27.375867000000 |



|   |                 |                 |                 |
|---|-----------------|-----------------|-----------------|
| H | 17.205614000000 | 25.105284000000 | 27.017005000000 |
| H | 15.303150000000 | 29.582881000000 | 29.421120000000 |
| H | 14.274706000000 | 28.312782000000 | 28.698586000000 |
| H | 7.094451000000  | 31.815097000000 | 22.953943000000 |
| H | 7.433497000000  | 30.177094000000 | 23.576161000000 |
| H | 10.370271000000 | 30.232175000000 | 27.196907000000 |
| H | 10.431256000000 | 31.929287000000 | 27.746211000000 |
| N | 14.666727000000 | 28.602076000000 | 22.148760000000 |
| N | 13.705531000000 | 27.842960000000 | 22.080080000000 |
| C | 14.994112000000 | 29.311642000000 | 20.852945000000 |
| C | 13.378088000000 | 27.133397000000 | 23.375875000000 |
| C | 14.154838000000 | 28.854974000000 | 19.664233000000 |
| H | 13.104926000000 | 29.053559000000 | 19.875324000000 |
| H | 14.419292000000 | 29.410758000000 | 18.764128000000 |
| H | 14.253860000000 | 27.784481000000 | 19.479486000000 |
| C | 14.775582000000 | 30.812257000000 | 21.138923000000 |
| H | 15.285259000000 | 31.139097000000 | 22.045910000000 |
| H | 15.134249000000 | 31.408619000000 | 20.299059000000 |
| H | 13.708605000000 | 31.007334000000 | 21.250967000000 |
| C | 14.217295000000 | 27.590076000000 | 24.564628000000 |
| H | 14.118286000000 | 28.660574000000 | 24.749356000000 |
| H | 13.952785000000 | 27.034309000000 | 25.464725000000 |
| H | 15.267213000000 | 27.391466000000 | 24.353595000000 |
| C | 13.596641000000 | 25.632781000000 | 23.089929000000 |
| H | 13.237913000000 | 25.036429000000 | 23.929774000000 |
| H | 13.087029000000 | 25.305933000000 | 22.182908000000 |
| H | 14.663624000000 | 25.437701000000 | 22.977966000000 |
| C | 16.491828000000 | 29.028424000000 | 20.674131000000 |
| C | 11.880355000000 | 27.416630000000 | 23.554575000000 |
| N | 16.939729000000 | 28.508955000000 | 19.552903000000 |
| N | 17.311005000000 | 29.290639000000 | 21.671222000000 |
| N | 11.061245000000 | 27.154463000000 | 22.557416000000 |
| N | 11.432397000000 | 27.936070000000 | 24.675794000000 |
| H | 16.991921000000 | 29.713966000000 | 22.533812000000 |
| H | 18.307090000000 | 29.069939000000 | 21.624538000000 |
| H | 16.352152000000 | 28.336932000000 | 18.740595000000 |
| H | 17.914017000000 | 28.225449000000 | 19.440806000000 |
| H | 10.458124000000 | 28.219638000000 | 24.787874000000 |
| H | 12.019952000000 | 28.108020000000 | 25.488131000000 |
| H | 10.065156000000 | 27.375164000000 | 22.604041000000 |
| H | 11.380396000000 | 26.731161000000 | 21.694840000000 |

### AAPH@CB[8] in PCM model

Total Energy= -5461.23366832

Total and zero-point Energy= -5459.812743

Total and thermal Energy= -5459.727122

Total Energy and thermal Enthalpies= -5459.726178

Total and thermal Free Energy= -5459.931114

2 1

|   |                 |                 |                 |
|---|-----------------|-----------------|-----------------|
| O | 12.732787000000 | 23.006889000000 | 19.052524000000 |
| O | 15.475785000000 | 22.680642000000 | 21.573531000000 |
| O | 16.515486000000 | 24.078190000000 | 25.064419000000 |
| O | 15.359380000000 | 26.561068000000 | 27.758564000000 |
| O | 16.056165000000 | 27.714075000000 | 17.154506000000 |
| O | 19.265738000000 | 26.689349000000 | 19.104740000000 |
| O | 20.202224000000 | 27.912124000000 | 22.151213000000 |

|   |                 |                 |                 |
|---|-----------------|-----------------|-----------------|
| O | 18.200277000000 | 30.546019000000 | 24.262364000000 |
| N | 12.887183000000 | 24.504959000000 | 17.291614000000 |
| N | 14.751854000000 | 23.553162000000 | 18.053548000000 |
| N | 16.578962000000 | 23.017783000000 | 19.564301000000 |
| N | 17.698048000000 | 23.339930000000 | 21.467510000000 |
| N | 18.342433000000 | 24.208085000000 | 23.639666000000 |
| N | 18.337754000000 | 25.440410000000 | 25.500820000000 |
| N | 17.473796000000 | 27.142508000000 | 27.008416000000 |
| N | 16.149428000000 | 28.738697000000 | 27.822004000000 |
| N | 14.220914000000 | 26.426620000000 | 16.583415000000 |
| N | 16.101279000000 | 25.398450000000 | 17.199219000000 |
| N | 17.956607000000 | 24.826655000000 | 18.662511000000 |
| N | 19.365937000000 | 24.764512000000 | 20.383560000000 |
| N | 20.005604000000 | 25.643955000000 | 22.564159000000 |
| N | 19.652233000000 | 27.065809000000 | 24.237448000000 |
| N | 18.691044000000 | 28.772569000000 | 25.669954000000 |
| N | 17.278626000000 | 30.345478000000 | 26.376628000000 |
| C | 13.384347000000 | 23.628261000000 | 18.234531000000 |
| C | 15.542842000000 | 22.525292000000 | 18.689497000000 |
| H | 16.006310000000 | 21.895984000000 | 17.924309000000 |
| H | 14.859697000000 | 21.928383000000 | 19.290084000000 |
| C | 16.466647000000 | 22.990509000000 | 20.939406000000 |
| C | 18.016470000000 | 23.045035000000 | 22.846269000000 |
| C | 17.602976000000 | 24.533050000000 | 24.763146000000 |
| C | 17.985951000000 | 25.799283000000 | 26.853889000000 |
| C | 16.228249000000 | 27.387619000000 | 27.547384000000 |
| C | 15.072952000000 | 29.301806000000 | 28.600745000000 |
| C | 13.908371000000 | 25.017292000000 | 16.409464000000 |
| H | 13.658828000000 | 24.810764000000 | 15.365737000000 |
| C | 15.202313000000 | 24.301819000000 | 16.900065000000 |
| H | 15.648526000000 | 23.637691000000 | 16.155708000000 |
| C | 17.881508000000 | 23.442886000000 | 19.124321000000 |
| H | 18.278059000000 | 22.766142000000 | 18.363889000000 |
| C | 18.714720000000 | 23.475552000000 | 20.437224000000 |
| H | 19.454315000000 | 22.675217000000 | 20.512581000000 |
| C | 19.676896000000 | 24.779794000000 | 23.676121000000 |
| C | 19.599525000000 | 25.759859000000 | 24.881812000000 |
| C | 18.317740000000 | 28.319798000000 | 26.994084000000 |
| C | 17.372012000000 | 29.444474000000 | 27.511026000000 |
| C | 15.512457000000 | 26.625296000000 | 17.006508000000 |
| C | 17.528901000000 | 25.236819000000 | 17.342052000000 |
| H | 17.869468000000 | 24.500884000000 | 16.606948000000 |
| H | 17.997179000000 | 26.197010000000 | 17.137018000000 |
| C | 18.892673000000 | 25.550351000000 | 19.363617000000 |
| C | 20.431357000000 | 25.183975000000 | 21.262652000000 |
| H | 21.125275000000 | 24.351630000000 | 21.394569000000 |
| H | 20.942069000000 | 26.013217000000 | 20.778612000000 |
| C | 19.967582000000 | 26.972031000000 | 22.902826000000 |
| C | 19.860838000000 | 28.291420000000 | 24.973699000000 |
| C | 18.062693000000 | 29.946547000000 | 25.320901000000 |
| C | 16.789377000000 | 31.700593000000 | 26.486216000000 |
| O | 15.251364000000 | 33.089793000000 | 24.511643000000 |
| O | 12.255040000000 | 33.853402000000 | 22.455203000000 |
| O | 11.167370000000 | 32.645016000000 | 19.169219000000 |
| O | 12.869749000000 | 30.090005000000 | 16.979847000000 |
| O | 12.412970000000 | 28.778955000000 | 27.603953000000 |

|   |                 |                 |                 |
|---|-----------------|-----------------|-----------------|
| O | 9.309197000000  | 29.371893000000 | 25.332575000000 |
| O | 8.699162000000  | 28.040640000000 | 22.077707000000 |
| O | 9.905460000000  | 25.355849000000 | 19.391064000000 |
| N | 15.351695000000 | 31.819366000000 | 26.449850000000 |
| N | 13.451563000000 | 32.874300000000 | 25.955576000000 |
| N | 11.497366000000 | 33.229756000000 | 24.554561000000 |
| N | 10.130320000000 | 32.997837000000 | 22.806489000000 |
| N | 9.429842000000  | 32.173178000000 | 20.629054000000 |
| N | 9.666613000000  | 30.917195000000 | 18.805433000000 |
| N | 10.698180000000 | 29.335529000000 | 17.269848000000 |
| N | 12.268834000000 | 27.868931000000 | 16.668723000000 |
| N | 14.206784000000 | 30.212600000000 | 27.882900000000 |
| N | 12.297208000000 | 31.033643000000 | 27.075190000000 |
| N | 10.324963000000 | 31.422477000000 | 25.706906000000 |
| N | 8.943390000000  | 31.208808000000 | 23.978404000000 |
| N | 8.364603000000  | 30.313532000000 | 21.793635000000 |
| N | 8.657083000000  | 29.041530000000 | 19.989387000000 |
| N | 9.661193000000  | 27.460436000000 | 18.443301000000 |
| N | 10.937165000000 | 25.953802000000 | 17.404133000000 |
| C | 14.736728000000 | 32.637163000000 | 25.517151000000 |
| C | 12.574231000000 | 33.822340000000 | 25.313210000000 |
| C | 11.395942000000 | 33.398536000000 | 23.187077000000 |
| C | 9.600050000000  | 33.311712000000 | 21.497618000000 |
| C | 10.205388000000 | 31.979380000000 | 19.504545000000 |
| C | 10.061462000000 | 30.618313000000 | 17.448658000000 |
| C | 12.040332000000 | 29.198817000000 | 16.984761000000 |
| C | 13.463323000000 | 27.485659000000 | 15.952993000000 |
| H | 14.104133000000 | 28.363147000000 | 15.902350000000 |
| H | 13.196429000000 | 27.166877000000 | 14.939104000000 |
| C | 14.520780000000 | 31.599301000000 | 27.620525000000 |
| C | 13.152783000000 | 32.207210000000 | 27.198061000000 |
| C | 10.267109000000 | 32.764664000000 | 25.151788000000 |
| C | 9.308147000000  | 32.611365000000 | 23.932303000000 |
| C | 8.306143000000  | 31.266250000000 | 20.702353000000 |
| C | 8.485244000000  | 30.373485000000 | 19.436758000000 |
| C | 9.981520000000  | 28.089150000000 | 17.169807000000 |
| H | 9.081393000000  | 28.209003000000 | 16.560936000000 |
| C | 11.026074000000 | 27.116441000000 | 16.558701000000 |
| H | 10.827016000000 | 26.852889000000 | 15.516753000000 |
| C | 12.921742000000 | 29.891336000000 | 27.526158000000 |
| C | 10.852616000000 | 31.128230000000 | 27.017821000000 |
| C | 9.514467000000  | 30.543269000000 | 25.030606000000 |
| C | 7.934511000000  | 30.606977000000 | 23.141853000000 |
| C | 8.592339000000  | 29.030916000000 | 21.360953000000 |
| C | 8.496469000000  | 27.834985000000 | 19.211123000000 |
| H | 7.640386000000  | 27.968046000000 | 18.540116000000 |
| H | 8.294464000000  | 27.020183000000 | 19.902877000000 |
| C | 10.151978000000 | 26.166068000000 | 18.517409000000 |
| C | 11.470794000000 | 24.658921000000 | 17.058181000000 |
| H | 10.964055000000 | 23.920351000000 | 17.675652000000 |
| H | 11.258955000000 | 24.466664000000 | 16.002631000000 |
| H | 18.854899000000 | 22.340717000000 | 22.879733000000 |
| H | 17.135394000000 | 22.586680000000 | 23.290877000000 |
| H | 20.430988000000 | 23.997331000000 | 23.787969000000 |
| H | 20.421097000000 | 25.652136000000 | 25.593980000000 |
| H | 19.205806000000 | 28.170330000000 | 27.612429000000 |

|   |                 |                 |                 |
|---|-----------------|-----------------|-----------------|
| H | 17.750520000000 | 29.971897000000 | 28.389583000000 |
| H | 14.959469000000 | 32.069562000000 | 28.503594000000 |
| H | 12.737395000000 | 32.907487000000 | 27.926225000000 |
| H | 9.910358000000  | 33.469705000000 | 25.906521000000 |
| H | 8.415194000000  | 33.238197000000 | 23.989984000000 |
| H | 7.362707000000  | 31.816132000000 | 20.727624000000 |
| H | 7.632024000000  | 30.396794000000 | 18.754816000000 |
| H | 20.161899000000 | 29.050355000000 | 24.254914000000 |
| H | 20.662040000000 | 28.143643000000 | 25.704918000000 |
| H | 17.180198000000 | 32.261224000000 | 25.639982000000 |
| H | 17.166630000000 | 32.132261000000 | 27.419374000000 |
| H | 13.176328000000 | 34.401918000000 | 24.616726000000 |
| H | 12.153649000000 | 34.482931000000 | 26.076515000000 |
| H | 10.307591000000 | 33.981129000000 | 21.012696000000 |
| H | 8.637083000000  | 33.815941000000 | 21.618602000000 |
| H | 10.776122000000 | 31.382187000000 | 17.149700000000 |
| H | 9.181244000000  | 30.662519000000 | 16.800829000000 |
| H | 18.868774000000 | 25.674550000000 | 27.488003000000 |
| H | 17.199993000000 | 25.122070000000 | 27.181260000000 |
| H | 15.491600000000 | 29.832453000000 | 29.459933000000 |
| H | 14.459204000000 | 28.472159000000 | 28.944458000000 |
| H | 7.069264000000  | 31.272866000000 | 23.091551000000 |
| H | 7.649038000000  | 29.668296000000 | 23.611399000000 |
| H | 10.449458000000 | 30.165637000000 | 27.324913000000 |
| H | 10.521142000000 | 31.903426000000 | 27.716300000000 |
| N | 15.107623000000 | 29.030502000000 | 22.332059000000 |
| N | 14.087455000000 | 28.352982000000 | 22.341322000000 |
| C | 15.445530000000 | 29.633669000000 | 20.994404000000 |
| C | 13.766129000000 | 27.739974000000 | 23.668687000000 |
| C | 14.476866000000 | 29.268316000000 | 19.875933000000 |
| H | 13.482430000000 | 29.632444000000 | 20.130711000000 |
| H | 14.768430000000 | 29.745296000000 | 18.940545000000 |
| H | 14.408958000000 | 28.191020000000 | 19.724335000000 |
| C | 15.465438000000 | 31.155621000000 | 21.238519000000 |
| H | 16.061046000000 | 31.414597000000 | 22.113636000000 |
| H | 15.870362000000 | 31.666614000000 | 20.363979000000 |
| H | 14.444368000000 | 31.501916000000 | 21.405699000000 |
| C | 14.492190000000 | 28.386073000000 | 24.842670000000 |
| H | 14.251403000000 | 29.444773000000 | 24.935032000000 |
| H | 14.250201000000 | 27.870707000000 | 25.770510000000 |
| H | 15.565012000000 | 28.297758000000 | 24.687420000000 |
| C | 14.151966000000 | 26.249774000000 | 23.532666000000 |
| H | 13.874852000000 | 25.709494000000 | 24.437753000000 |
| H | 13.661295000000 | 25.789359000000 | 22.674830000000 |
| H | 15.232402000000 | 26.179377000000 | 23.403725000000 |
| C | 16.870677000000 | 29.126435000000 | 20.750684000000 |
| C | 12.242356000000 | 27.845160000000 | 23.777714000000 |
| N | 17.177714000000 | 28.528298000000 | 19.623702000000 |
| N | 17.764275000000 | 29.291674000000 | 21.701692000000 |
| N | 11.538789000000 | 27.826674000000 | 22.664513000000 |
| N | 11.666632000000 | 27.907005000000 | 24.955575000000 |
| H | 17.533608000000 | 29.727192000000 | 22.589624000000 |
| H | 18.704758000000 | 28.897493000000 | 21.637528000000 |
| H | 16.515514000000 | 28.387541000000 | 18.864504000000 |
| H | 18.089851000000 | 28.088156000000 | 19.484055000000 |
| H | 10.674431000000 | 28.139118000000 | 25.037206000000 |

|   |                 |                 |                 |
|---|-----------------|-----------------|-----------------|
| H | 12.195242000000 | 28.003660000000 | 25.818299000000 |
| H | 10.516876000000 | 27.843935000000 | 22.642275000000 |
| H | 12.043517000000 | 27.850204000000 | 21.789132000000 |

## 2AAPH@CB[8] in the gas phase

Total Energy= -6106.00003063

Total and zero-point Energy= -6104.274040

Total and thermal Energy= -6104.171161

Total Energy and thermal Enthalpies= -6104.170217

Total and thermal Free Energy= -6104.404589

4 1

|   |                 |                 |                 |
|---|-----------------|-----------------|-----------------|
| O | -1.157631000000 | 4.214259000000  | 3.045383000000  |
| O | -4.365985000000 | 2.380390000000  | 2.965893000000  |
| O | -5.702243000000 | -1.131658000000 | 3.222781000000  |
| O | -3.063000000000 | -3.792787000000 | 3.068174000000  |
| O | -1.008608000000 | 4.014333000000  | -2.915570000000 |
| O | -4.500664000000 | 2.200425000000  | -2.792149000000 |
| O | -5.253399000000 | -0.740387000000 | -2.835085000000 |
| O | -2.817357000000 | -3.354355000000 | -2.883289000000 |
| N | -0.129652000000 | 5.230940000000  | 1.232534000000  |
| N | -2.365453000000 | 5.051291000000  | 1.257879000000  |
| N | -4.574841000000 | 3.986951000000  | 1.308639000000  |
| N | -5.910397000000 | 2.182533000000  | 1.241344000000  |
| N | -6.604987000000 | -0.157902000000 | 1.321435000000  |
| N | -6.141319000000 | -2.347754000000 | 1.297868000000  |
| N | -4.413063000000 | -4.087150000000 | 1.200226000000  |
| N | -2.345668000000 | -4.969471000000 | 1.206998000000  |
| N | -0.082362000000 | 5.275641000000  | -1.204474000000 |
| N | -2.277636000000 | 4.823721000000  | -1.149580000000 |
| N | -4.460533000000 | 3.778770000000  | -1.105755000000 |
| N | -6.157333000000 | 2.332982000000  | -1.182414000000 |
| N | -6.646435000000 | -0.057180000000 | -1.119514000000 |
| N | -5.906602000000 | -2.158150000000 | -1.132377000000 |
| N | -4.316681000000 | -3.982670000000 | -1.233839000000 |
| N | -2.276482000000 | -4.876287000000 | -1.220394000000 |
| C | -1.209203000000 | 4.771007000000  | 1.973256000000  |
| C | -3.683308000000 | 4.977561000000  | 1.871618000000  |
| H | -4.161512000000 | 5.959093000000  | 1.802941000000  |
| H | -3.529973000000 | 4.718236000000  | 2.918666000000  |
| C | -4.890159000000 | 2.796588000000  | 1.961303000000  |
| C | -6.760605000000 | 1.169528000000  | 1.866068000000  |
| C | -6.105959000000 | -1.205020000000 | 2.091061000000  |
| C | -5.669826000000 | -3.627293000000 | 1.784660000000  |
| C | -3.257450000000 | -4.227766000000 | 1.959073000000  |
| C | -1.195966000000 | -5.578934000000 | 1.834678000000  |
| C | -0.537082000000 | 5.908555000000  | 0.019624000000  |
| H | -0.240906000000 | 6.962225000000  | 0.037960000000  |
| C | -2.081726000000 | 5.694609000000  | -0.000883000000 |
| H | -2.652014000000 | 6.621700000000  | -0.114068000000 |
| C | -5.275391000000 | 4.130859000000  | 0.064547000000  |
| H | -5.707506000000 | 5.128227000000  | -0.051094000000 |
| C | -6.333179000000 | 2.981898000000  | 0.105605000000  |
| H | -7.362480000000 | 3.330200000000  | 0.220577000000  |
| C | -7.213711000000 | -0.616439000000 | 0.093428000000  |
| C | -6.787605000000 | -2.122096000000 | 0.029018000000  |
| C | -4.338171000000 | -4.814916000000 | -0.048422000000 |

|   |                 |                 |                 |
|---|-----------------|-----------------|-----------------|
| C | -2.906702000000 | -5.439099000000 | -0.038127000000 |
| C | -1.098850000000 | 4.636493000000  | -1.875776000000 |
| C | -3.575594000000 | 4.714619000000  | -1.778191000000 |
| H | -4.053053000000 | 5.700827000000  | -1.805141000000 |
| H | -3.426845000000 | 4.363714000000  | -2.797231000000 |
| C | -5.005384000000 | 2.718004000000  | -1.800814000000 |
| C | -6.970902000000 | 1.235109000000  | -1.671245000000 |
| H | -8.016529000000 | 1.464406000000  | -1.457504000000 |
| H | -6.826869000000 | 1.183512000000  | -2.748930000000 |
| C | -5.866395000000 | -0.958203000000 | -1.803462000000 |
| C | -5.497815000000 | -3.376989000000 | -1.794052000000 |
| C | -3.106462000000 | -3.997163000000 | -1.887216000000 |
| C | -1.141839000000 | -5.485276000000 | -1.875183000000 |
| O | 1.158852000000  | -4.211489000000 | -3.042512000000 |
| O | 4.368855000000  | -2.381820000000 | -2.965247000000 |
| O | 5.703370000000  | 1.129309000000  | -3.222442000000 |
| O | 3.061663000000  | 3.790576000000  | -3.068197000000 |
| O | 1.006650000000  | -4.016021000000 | 2.916894000000  |
| O | 4.498065000000  | -2.197565000000 | 2.792678000000  |
| O | 5.255398000000  | 0.744794000000  | 2.837457000000  |
| O | 2.819938000000  | 3.354428000000  | 2.882771000000  |
| N | 0.130301000000  | -5.230896000000 | -1.231464000000 |
| N | 2.366201000000  | -5.051855000000 | -1.256352000000 |
| N | 4.575492000000  | -3.987096000000 | -1.306485000000 |
| N | 5.911461000000  | -2.182948000000 | -1.239207000000 |
| N | 6.607111000000  | 0.157195000000  | -1.320772000000 |
| N | 6.140449000000  | 2.346392000000  | -1.297686000000 |
| N | 4.412578000000  | 4.086008000000  | -1.200945000000 |
| N | 2.345652000000  | 4.969236000000  | -1.207917000000 |
| N | 0.082088000000  | -5.277918000000 | 1.205418000000  |
| N | 2.276811000000  | -4.823500000000 | 1.150860000000  |
| N | 4.459216000000  | -3.777492000000 | 1.107624000000  |
| N | 6.156425000000  | -2.332189000000 | 1.184880000000  |
| N | 6.644853000000  | 0.057911000000  | 1.120298000000  |
| N | 5.908856000000  | 2.160200000000  | 1.133061000000  |
| N | 4.318508000000  | 3.984464000000  | 1.233374000000  |
| N | 2.276873000000  | 4.875045000000  | 1.219353000000  |
| C | 1.210104000000  | -4.770155000000 | -1.971323000000 |
| C | 3.684242000000  | -4.977833000000 | -1.869666000000 |
| C | 4.891836000000  | -2.797317000000 | -1.959765000000 |
| C | 6.762603000000  | -1.170714000000 | -1.864096000000 |
| C | 6.106791000000  | 1.203439000000  | -2.090656000000 |
| C | 5.669036000000  | 3.625552000000  | -1.785531000000 |
| C | 3.256776000000  | 4.226457000000  | -1.959546000000 |
| C | 1.194986000000  | 5.577283000000  | -1.835042000000 |
| H | 1.154001000000  | 5.205778000000  | -2.858283000000 |
| H | 1.316432000000  | 6.666901000000  | -1.848305000000 |
| C | 0.537498000000  | -5.909571000000 | -0.019009000000 |
| C | 2.082050000000  | -5.694964000000 | 0.002339000000  |
| C | 5.275022000000  | -4.130449000000 | -0.061785000000 |
| C | 6.333138000000  | -2.981809000000 | -0.102679000000 |
| C | 7.213985000000  | 0.616392000000  | -0.092218000000 |
| C | 6.788281000000  | 2.122268000000  | -0.029262000000 |
| C | 4.338491000000  | 4.815249000000  | 0.046994000000  |
| H | 5.141115000000  | 5.556064000000  | 0.113485000000  |
| C | 2.906685000000  | 5.438679000000  | 0.037197000000  |

|   |                 |                 |                 |
|---|-----------------|-----------------|-----------------|
| H | 2.907031000000  | 6.532529000000  | 0.087602000000  |
| C | 1.097701000000  | -4.637789000000 | 1.876955000000  |
| C | 3.574341000000  | -4.713398000000 | 1.780123000000  |
| C | 5.003687000000  | -2.716292000000 | 1.802320000000  |
| C | 6.969416000000  | -1.233727000000 | 1.673407000000  |
| C | 5.867268000000  | 0.960751000000  | 1.804813000000  |
| C | 5.500282000000  | 3.379740000000  | 1.793403000000  |
| H | 6.320990000000  | 4.102782000000  | 1.749161000000  |
| H | 5.289318000000  | 3.138484000000  | 2.833729000000  |
| C | 3.108207000000  | 3.997330000000  | 1.886567000000  |
| C | 1.143103000000  | 5.484691000000  | 1.875186000000  |
| H | 1.081092000000  | 5.080199000000  | 2.884246000000  |
| H | 1.308466000000  | 6.568050000000  | 1.929180000000  |
| H | -7.803460000000 | 1.492669000000  | 1.780532000000  |
| H | -6.485518000000 | 1.110713000000  | 2.919420000000  |
| H | -8.297968000000 | -0.469085000000 | 0.105810000000  |
| H | -7.628885000000 | -2.807011000000 | -0.114684000000 |
| H | -5.141106000000 | -5.555249000000 | -0.116589000000 |
| H | -2.907576000000 | -6.532970000000 | -0.088081000000 |
| H | 0.241722000000  | -6.963326000000 | -0.038456000000 |
| H | 2.652705000000  | -6.621748000000 | 0.116133000000  |
| H | 5.706787000000  | -5.127855000000 | 0.054851000000  |
| H | 7.362439000000  | -3.330436000000 | -0.216647000000 |
| H | 8.298232000000  | 0.468766000000  | -0.102872000000 |
| H | 7.629943000000  | 2.807155000000  | 0.112364000000  |
| H | -5.285975000000 | -3.134524000000 | -2.833910000000 |
| H | -6.318810000000 | -4.099837000000 | -1.751406000000 |
| H | -1.079289000000 | -5.080696000000 | -2.884174000000 |
| H | -1.306563000000 | -6.568715000000 | -1.929310000000 |
| H | 3.531278000000  | -4.718493000000 | -2.916764000000 |
| H | 4.162456000000  | -5.959344000000 | -1.800824000000 |
| H | 6.488390000000  | -1.112727000000 | -2.917720000000 |
| H | 7.805256000000  | -1.494160000000 | -1.777391000000 |
| H | 5.505719000000  | 3.512451000000  | -2.857372000000 |
| H | 6.435299000000  | 4.387029000000  | -1.611231000000 |
| H | -6.435941000000 | -4.388659000000 | 1.609325000000  |
| H | -5.506951000000 | -3.515171000000 | 2.856668000000  |
| H | -1.318290000000 | -6.668460000000 | 1.847120000000  |
| H | -1.155491000000 | -5.208142000000 | 2.858200000000  |
| H | 8.015234000000  | -1.463066000000 | 1.460578000000  |
| H | 6.824602000000  | -1.181254000000 | 2.750947000000  |
| H | 3.424771000000  | -4.362114000000 | 2.798906000000  |
| H | 4.052368000000  | -5.699319000000 | 1.807911000000  |
| N | -1.018499000000 | 0.332894000000  | 2.227897000000  |
| N | -0.342990000000 | -0.429167000000 | 2.910939000000  |
| C | -1.848232000000 | -0.352837000000 | 1.192472000000  |
| C | 0.290337000000  | 0.208678000000  | 4.118497000000  |
| C | -1.179767000000 | -1.552537000000 | 0.518894000000  |
| H | -0.728621000000 | -2.168584000000 | 1.294719000000  |
| H | -1.912246000000 | -2.172358000000 | 0.000602000000  |
| H | -0.414471000000 | -1.255427000000 | -0.196120000000 |
| C | -3.126131000000 | -0.771667000000 | 1.943845000000  |
| H | -3.574577000000 | 0.071212000000  | 2.467234000000  |
| H | -3.835661000000 | -1.179033000000 | 1.226816000000  |
| H | -2.878115000000 | -1.547123000000 | 2.666758000000  |
| C | -0.408004000000 | -0.480200000000 | 5.313986000000  |

|   |                 |                 |                 |
|---|-----------------|-----------------|-----------------|
| H | -0.409331000000 | -1.565818000000 | 5.220693000000  |
| H | 0.091666000000  | -0.203456000000 | 6.243454000000  |
| H | -1.442204000000 | -0.137820000000 | 5.359457000000  |
| C | 0.129712000000  | 1.718000000000  | 4.198285000000  |
| H | 0.581954000000  | 2.093953000000  | 5.117726000000  |
| H | 0.570221000000  | 2.241154000000  | 3.351334000000  |
| H | -0.925308000000 | 1.978339000000  | 4.224540000000  |
| C | -2.277941000000 | 0.725831000000  | 0.209196000000  |
| C | 1.749613000000  | -0.241962000000 | 4.049654000000  |
| N | -2.182014000000 | 1.982676000000  | 0.571604000000  |
| N | -2.795166000000 | 0.365886000000  | -0.951722000000 |
| N | 2.010875000000  | -1.531082000000 | 3.993419000000  |
| N | 2.711998000000  | 0.654517000000  | 4.022245000000  |
| H | -2.866405000000 | -0.608768000000 | -1.201554000000 |
| H | -3.213807000000 | 1.026983000000  | -1.601177000000 |
| H | -1.832129000000 | 2.174733000000  | 1.507095000000  |
| H | -2.532187000000 | 2.750507000000  | 0.007248000000  |
| H | 3.693947000000  | 0.406445000000  | 3.904778000000  |
| H | 2.514801000000  | 1.648919000000  | 3.981298000000  |
| H | 2.961910000000  | -1.873518000000 | 3.876374000000  |
| H | 1.273367000000  | -2.217893000000 | 3.881630000000  |
| N | 1.018118000000  | -0.332776000000 | -2.230949000000 |
| N | 0.341689000000  | 0.429447000000  | -2.912919000000 |
| C | 1.847504000000  | 0.352531000000  | -1.195031000000 |
| C | -0.290836000000 | -0.207459000000 | -4.121345000000 |
| C | 3.126249000000  | 0.770184000000  | -1.945788000000 |
| H | 2.879334000000  | 1.545301000000  | -2.669445000000 |
| H | 3.835389000000  | 1.177669000000  | -1.228425000000 |
| H | 3.574714000000  | -0.073301000000 | -2.468192000000 |
| C | 1.179535000000  | 1.552832000000  | -0.522065000000 |
| H | 0.413461000000  | 1.256399000000  | 0.192411000000  |
| H | 1.912100000000  | 2.172198000000  | -0.003332000000 |
| H | 0.729332000000  | 2.169125000000  | -1.298232000000 |
| C | -0.128193000000 | -1.716502000000 | -4.203417000000 |
| H | -0.568371000000 | -2.241480000000 | -3.357385000000 |
| H | -0.579538000000 | -2.091507000000 | -5.123692000000 |
| H | 0.927162000000  | -1.975489000000 | -4.229562000000 |
| C | 0.406503000000  | 0.484250000000  | -5.315777000000 |
| H | -0.092836000000 | 0.208337000000  | -6.245671000000 |
| H | 0.406379000000  | 1.569715000000  | -5.220691000000 |
| H | 1.441162000000  | 0.143336000000  | -5.361863000000 |
| C | 2.276211000000  | -0.726206000000 | -0.211462000000 |
| C | -1.750818000000 | 0.240923000000  | -4.052021000000 |
| N | 2.180932000000  | -1.983048000000 | -0.574014000000 |
| N | 2.792224000000  | -0.366289000000 | 0.950037000000  |
| N | -2.014204000000 | 1.529535000000  | -3.993602000000 |
| N | -2.711593000000 | -0.657316000000 | -4.026839000000 |
| H | 2.862661000000  | 0.608348000000  | 1.200140000000  |
| H | 3.210311000000  | -1.027389000000 | 1.599837000000  |
| H | 1.832031000000  | -2.175439000000 | -1.509847000000 |
| H | 2.530875000000  | -2.750651000000 | -0.009215000000 |
| H | -3.694004000000 | -0.411571000000 | -3.908662000000 |
| H | -2.512225000000 | -1.651249000000 | -3.986284000000 |
| H | -2.965820000000 | 1.870466000000  | -3.877030000000 |
| H | -1.277809000000 | 2.217406000000  | -3.880724000000 |



## 2AAPH@CB[8] in PCM model

Total Energy= -6106.63289656

Total and zero-point Energy= -6104.900562

Total and thermal Energy= -6104.799545

Total Energy and thermal Enthalpies= -6104.798601

Total and thermal Free Energy= -6105.025663

4 1

|   |                 |                 |                 |
|---|-----------------|-----------------|-----------------|
| O | -0.924001000000 | -4.559038000000 | -3.112311000000 |
| O | -4.343627000000 | -2.627384000000 | -3.028481000000 |
| O | -5.787446000000 | 0.863009000000  | -3.290954000000 |
| O | -3.305687000000 | 3.672816000000  | -3.213754000000 |
| O | -0.808282000000 | -3.921111000000 | 3.007428000000  |
| O | -4.546263000000 | -2.292144000000 | 2.881000000000  |
| O | -5.521214000000 | 0.633639000000  | 2.895791000000  |
| O | -3.094938000000 | 3.489934000000  | 2.931176000000  |
| N | 0.125745000000  | -5.241749000000 | -1.157614000000 |
| N | -2.107996000000 | -5.081090000000 | -1.192318000000 |
| N | -4.342650000000 | -4.103070000000 | -1.242001000000 |
| N | -5.823190000000 | -2.423395000000 | -1.251116000000 |
| N | -6.609775000000 | -0.120867000000 | -1.358946000000 |
| N | -6.248720000000 | 2.080403000000  | -1.373003000000 |
| N | -4.620981000000 | 3.897611000000  | -1.315754000000 |
| N | -2.568191000000 | 4.790135000000  | -1.321966000000 |
| N | 0.157230000000  | -5.133412000000 | 1.288352000000  |
| N | -2.048154000000 | -4.725806000000 | 1.212059000000  |
| N | -4.296264000000 | -3.839772000000 | 1.176904000000  |
| N | -6.089576000000 | -2.517134000000 | 1.180509000000  |
| N | -6.720017000000 | -0.169965000000 | 1.090204000000  |
| N | -6.056836000000 | 1.955443000000  | 1.074999000000  |
| N | -4.513173000000 | 3.818646000000  | 1.128561000000  |
| N | -2.518217000000 | 4.816160000000  | 1.119350000000  |
| C | -0.961009000000 | -4.920247000000 | -1.952810000000 |
| C | -3.432415000000 | -5.084748000000 | -1.789682000000 |
| H | -3.876748000000 | -6.076901000000 | -1.674806000000 |
| H | -3.303574000000 | -4.860710000000 | -2.846266000000 |
| C | -4.784237000000 | -3.003034000000 | -1.959375000000 |
| C | -6.720577000000 | -1.464505000000 | -1.878695000000 |
| C | -6.171198000000 | 0.931721000000  | -2.139869000000 |
| C | -5.858473000000 | 3.379010000000  | -1.876155000000 |
| C | -3.480897000000 | 4.070503000000  | -2.077683000000 |
| C | -1.421783000000 | 5.412508000000  | -1.944292000000 |
| C | -0.281210000000 | -5.840106000000 | 0.100223000000  |
| H | 0.025068000000  | -6.887891000000 | 0.147558000000  |
| C | -1.821576000000 | -5.647264000000 | 0.104288000000  |
| H | -2.375533000000 | -6.575274000000 | 0.261901000000  |
| C | -5.055020000000 | -4.270460000000 | -0.001729000000 |
| H | -5.408832000000 | -5.294975000000 | 0.122301000000  |
| C | -6.195043000000 | -3.212409000000 | -0.086582000000 |
| H | -7.190827000000 | -3.641941000000 | -0.204611000000 |
| C | -7.266755000000 | 0.337886000000  | -0.148731000000 |
| C | -6.905175000000 | 1.855402000000  | -0.105467000000 |
| C | -4.559737000000 | 4.632984000000  | -0.069076000000 |
| C | -3.152539000000 | 5.295552000000  | -0.095423000000 |
| C | -0.881163000000 | -4.526845000000 | 1.952208000000  |
| C | -3.345379000000 | -4.693651000000 | 1.862087000000  |
| H | -3.748546000000 | -5.709334000000 | 1.919267000000  |

|   |                 |                 |                 |
|---|-----------------|-----------------|-----------------|
| H | -3.209080000000 | -4.304515000000 | 2.867627000000  |
| C | -4.946449000000 | -2.831542000000 | 1.851414000000  |
| C | -6.990318000000 | -1.477658000000 | 1.635575000000  |
| H | -8.010395000000 | -1.768085000000 | 1.383366000000  |
| H | -6.887755000000 | -1.412124000000 | 2.716112000000  |
| C | -6.036159000000 | 0.786809000000  | 1.796476000000  |
| C | -5.690072000000 | 3.208596000000  | 1.697477000000  |
| C | -3.347857000000 | 3.981313000000  | 1.840257000000  |
| C | -1.419489000000 | 5.514551000000  | 1.750262000000  |
| O | 0.923956000000  | 4.559176000000  | 3.112462000000  |
| O | 4.343570000000  | 2.627403000000  | 3.028577000000  |
| O | 5.787371000000  | -0.862947000000 | 3.291079000000  |
| O | 3.305638000000  | -3.672776000000 | 3.213908000000  |
| O | 0.808221000000  | 3.921181000000  | -3.007320000000 |
| O | 4.546200000000  | 2.292148000000  | -2.880880000000 |
| O | 5.521152000000  | -0.633654000000 | -2.895640000000 |
| O | 3.094917000000  | -3.489797000000 | -2.930989000000 |
| N | -0.125790000000 | 5.241826000000  | 1.157745000000  |
| N | 2.107949000000  | 5.081119000000  | 1.192437000000  |
| N | 4.342597000000  | 4.103094000000  | 1.242102000000  |
| N | 5.823140000000  | 2.423422000000  | 1.251218000000  |
| N | 6.609758000000  | 0.120907000000  | 1.359086000000  |
| N | 6.248675000000  | -2.080357000000 | 1.373146000000  |
| N | 4.620931000000  | -3.897563000000 | 1.315907000000  |
| N | 2.568149000000  | -4.790101000000 | 1.322122000000  |
| N | -0.157278000000 | 5.133461000000  | -1.288225000000 |
| N | 2.048106000000  | 4.725844000000  | -1.211945000000 |
| N | 4.296216000000  | 3.839805000000  | -1.176804000000 |
| N | 6.089524000000  | 2.517163000000  | -1.180405000000 |
| N | 6.719955000000  | 0.169993000000  | -1.090064000000 |
| N | 6.056844000000  | -1.955435000000 | -1.074859000000 |
| N | 4.513165000000  | -3.818623000000 | -1.128408000000 |
| N | 2.518167000000  | -4.816054000000 | -1.119192000000 |
| C | 0.960963000000  | 4.920331000000  | 1.952947000000  |
| C | 3.432370000000  | 5.084774000000  | 1.789794000000  |
| C | 4.784182000000  | 3.003057000000  | 1.959473000000  |
| C | 6.720539000000  | 1.464553000000  | 1.878814000000  |
| C | 6.171150000000  | -0.931671000000 | 2.140003000000  |
| C | 5.858422000000  | -3.378959000000 | 1.876309000000  |
| C | 3.480849000000  | -4.070463000000 | 2.077838000000  |
| C | 1.421729000000  | -5.412465000000 | 1.944434000000  |
| H | 1.358714000000  | -5.028778000000 | 2.960043000000  |
| H | 1.562732000000  | -6.498096000000 | 1.971197000000  |
| C | 0.281172000000  | 5.840159000000  | -0.100101000000 |
| C | 1.821536000000  | 5.647297000000  | -0.104169000000 |
| C | 5.054970000000  | 4.270489000000  | 0.001834000000  |
| C | 6.194993000000  | 3.212438000000  | 0.086686000000  |
| C | 7.266722000000  | -0.337848000000 | 0.148866000000  |
| C | 6.905158000000  | -1.855370000000 | 0.105619000000  |
| C | 4.559696000000  | -4.632949000000 | 0.069235000000  |
| H | 5.381081000000  | -5.350720000000 | 0.008163000000  |
| C | 3.152487000000  | -5.295494000000 | 0.095566000000  |
| H | 3.187925000000  | -6.387719000000 | 0.101768000000  |
| C | 0.881110000000  | 4.526899000000  | -1.952092000000 |
| C | 3.345328000000  | 4.693687000000  | -1.861982000000 |
| C | 4.946395000000  | 2.831567000000  | -1.851305000000 |

|   |                 |                 |                 |
|---|-----------------|-----------------|-----------------|
| C | 6.990258000000  | 1.477674000000  | -1.635459000000 |
| C | 6.036118000000  | -0.786801000000 | -1.796331000000 |
| C | 5.690075000000  | -3.208593000000 | -1.697319000000 |
| H | 6.527432000000  | -3.907737000000 | -1.619594000000 |
| H | 5.483638000000  | -3.005739000000 | -2.745863000000 |
| C | 3.347831000000  | -3.981219000000 | -1.840088000000 |
| C | 1.419449000000  | -5.514436000000 | -1.750134000000 |
| H | 1.373128000000  | -5.194488000000 | -2.788529000000 |
| H | 1.616984000000  | -6.591128000000 | -1.707356000000 |
| H | -7.747821000000 | -1.821578000000 | -1.768182000000 |
| H | -6.463967000000 | -1.417239000000 | -2.935174000000 |
| H | -8.340699000000 | 0.143896000000  | -0.195055000000 |
| H | -7.774144000000 | 2.508647000000  | 0.000245000000  |
| H | -5.381132000000 | 5.350742000000  | -0.007983000000 |
| H | -3.187993000000 | 6.387777000000  | -0.101657000000 |
| H | -0.025092000000 | 6.887948000000  | -0.147448000000 |
| H | 2.375502000000  | 6.575302000000  | -0.261779000000 |
| H | 5.408781000000  | 5.295005000000  | -0.122194000000 |
| H | 7.190777000000  | 3.641970000000  | 0.204714000000  |
| H | 8.340665000000  | -0.143846000000 | 0.195168000000  |
| H | 7.774134000000  | -2.508610000000 | -0.000064000000 |
| H | -5.483620000000 | 3.005727000000  | 2.746016000000  |
| H | -6.527438000000 | 3.907733000000  | 1.619774000000  |
| H | -1.373167000000 | 5.194638000000  | 2.788667000000  |
| H | -1.617011000000 | 6.591244000000  | 1.707448000000  |
| H | 3.303535000000  | 4.860735000000  | 2.846378000000  |
| H | 3.876707000000  | 6.076926000000  | 1.674917000000  |
| H | 6.463926000000  | 1.417299000000  | 2.935292000000  |
| H | 7.747778000000  | 1.821639000000  | 1.768297000000  |
| H | 5.709879000000  | -3.275551000000 | 2.949113000000  |
| H | 6.660878000000  | -4.094869000000 | 1.682404000000  |
| H | -6.660929000000 | 4.094916000000  | -1.682239000000 |
| H | -5.709935000000 | 3.275613000000  | -2.948961000000 |
| H | -1.562794000000 | 6.498138000000  | -1.971054000000 |
| H | -1.358777000000 | 5.028822000000  | -2.959903000000 |
| H | 8.010338000000  | 1.768102000000  | -1.383261000000 |
| H | 6.887690000000  | 1.412123000000  | -2.715995000000 |
| H | 3.209021000000  | 4.304555000000  | -2.867521000000 |
| H | 3.748498000000  | 5.709369000000  | -1.919162000000 |
| N | -0.945272000000 | -0.426189000000 | -2.213545000000 |
| N | -0.300012000000 | 0.314226000000  | -2.944761000000 |
| C | -1.844789000000 | 0.277131000000  | -1.256323000000 |
| C | 0.457507000000  | -0.402846000000 | -4.025292000000 |
| C | -1.225181000000 | 1.515013000000  | -0.605103000000 |
| H | -0.760623000000 | 2.116130000000  | -1.383838000000 |
| H | -1.984367000000 | 2.129222000000  | -0.122796000000 |
| H | -0.476648000000 | 1.252714000000  | 0.137444000000  |
| C | -3.102971000000 | 0.633492000000  | -2.064040000000 |
| H | -3.517322000000 | -0.244050000000 | -2.557389000000 |
| H | -3.845970000000 | 1.055239000000  | -1.392436000000 |
| H | -2.841951000000 | 1.381940000000  | -2.809306000000 |
| C | -0.164325000000 | 0.113538000000  | -5.341122000000 |
| H | -0.198931000000 | 1.201881000000  | -5.370800000000 |
| H | 0.419229000000  | -0.247502000000 | -6.188871000000 |
| H | -1.180921000000 | -0.272645000000 | -5.420908000000 |
| C | 0.375341000000  | -1.917977000000 | -3.949196000000 |

|   |                 |                 |                 |
|---|-----------------|-----------------|-----------------|
| H | 0.899255000000  | -2.363867000000 | -4.795469000000 |
| H | 0.796656000000  | -2.317070000000 | -3.028670000000 |
| H | -0.663364000000 | -2.232231000000 | -4.000369000000 |
| C | -2.258488000000 | -0.777455000000 | -0.238241000000 |
| C | 1.882190000000  | 0.133476000000  | -3.908227000000 |
| N | -2.027405000000 | -2.036202000000 | -0.508805000000 |
| N | -2.887781000000 | -0.393746000000 | 0.853754000000  |
| N | 2.058855000000  | 1.437238000000  | -3.871389000000 |
| N | 2.894236000000  | -0.704181000000 | -3.854285000000 |
| H | -3.024195000000 | 0.585455000000  | 1.044873000000  |
| H | -3.246984000000 | -1.053445000000 | 1.532263000000  |
| H | -1.547891000000 | -2.238247000000 | -1.378497000000 |
| H | -2.287052000000 | -2.799785000000 | 0.107639000000  |
| H | 3.859031000000  | -0.397205000000 | -3.720848000000 |
| H | 2.754960000000  | -1.707897000000 | -3.772651000000 |
| H | 2.986091000000  | 1.841268000000  | -3.735724000000 |
| H | 1.275735000000  | 2.071721000000  | -3.751718000000 |
| N | 0.945268000000  | 0.426240000000  | 2.213676000000  |
| N | 0.299945000000  | -0.314159000000 | 2.944854000000  |
| C | 1.844821000000  | -0.277088000000 | 1.256497000000  |
| C | -0.457576000000 | 0.402940000000  | 4.025363000000  |
| C | 3.102958000000  | -0.633459000000 | 2.064283000000  |
| H | 2.841885000000  | -1.381896000000 | 2.809544000000  |
| H | 3.845987000000  | -1.055225000000 | 1.392724000000  |
| H | 3.517293000000  | 0.244080000000  | 2.557649000000  |
| C | 1.225240000000  | -1.514962000000 | 0.605240000000  |
| H | 0.476756000000  | -1.252654000000 | -0.137354000000 |
| H | 1.984449000000  | -2.129179000000 | 0.122977000000  |
| H | 0.760627000000  | -2.116077000000 | 1.383943000000  |
| C | -0.375388000000 | 1.918069000000  | 3.949239000000  |
| H | -0.796694000000 | 2.317144000000  | 3.028700000000  |
| H | -0.899302000000 | 2.363986000000  | 4.795496000000  |
| H | 0.663320000000  | 2.232312000000  | 4.000417000000  |
| C | 0.164244000000  | -0.113427000000 | 5.341206000000  |
| H | -0.419311000000 | 0.247635000000  | 6.188945000000  |
| H | 0.198837000000  | -1.201770000000 | 5.370904000000  |
| H | 1.180843000000  | 0.272747000000  | 5.420991000000  |
| C | 2.258579000000  | 0.777501000000  | 0.238442000000  |
| C | -1.882268000000 | -0.133358000000 | 3.908313000000  |
| N | 2.027478000000  | 2.036248000000  | 0.508997000000  |
| N | 2.887940000000  | 0.393796000000  | -0.853514000000 |
| N | -2.058956000000 | -1.437117000000 | 3.871480000000  |
| N | -2.894295000000 | 0.704322000000  | 3.854389000000  |
| H | 3.024339000000  | -0.585404000000 | -1.044653000000 |
| H | 3.247197000000  | 1.053500000000  | -1.531990000000 |
| H | 1.547917000000  | 2.238285000000  | 1.378663000000  |
| H | 2.287145000000  | 2.799838000000  | -0.107429000000 |
| H | -3.859105000000 | 0.397381000000  | 3.720974000000  |
| H | -2.754994000000 | 1.708036000000  | 3.772765000000  |
| H | -2.986204000000 | -1.841140000000 | 3.735880000000  |
| H | -1.275849000000 | -2.071618000000 | 3.751811000000  |

## 2R\* from AAPH@CB[8] in the gas phase

Total Energy = -5460.99857304

Total and zero-point Energy= -5459.591303

Total and thermal Energy= -5459.499433

Total Energy and thermal Enthalpies= -5459.498489

Total and thermal Free Energy= -5459.725162

2 3

|   |                 |                 |                 |
|---|-----------------|-----------------|-----------------|
| O | 12.914938000000 | 23.122459000000 | 19.551585000000 |
| O | 15.709917000000 | 22.613517000000 | 21.738096000000 |
| O | 16.768249000000 | 24.023362000000 | 25.100714000000 |
| O | 15.426628000000 | 26.393800000000 | 27.475219000000 |
| O | 15.953438000000 | 27.710257000000 | 17.159224000000 |
| O | 19.132099000000 | 26.803671000000 | 19.223812000000 |
| O | 20.075710000000 | 28.005260000000 | 22.151719000000 |
| O | 18.253876000000 | 30.652653000000 | 24.338722000000 |
| N | 12.921280000000 | 24.584081000000 | 17.750357000000 |
| N | 14.797765000000 | 23.478012000000 | 18.246809000000 |
| N | 16.709858000000 | 22.985870000000 | 19.680358000000 |
| N | 17.913012000000 | 23.310818000000 | 21.533219000000 |
| N | 18.601374000000 | 24.186576000000 | 23.689519000000 |
| N | 18.564741000000 | 25.417084000000 | 25.551724000000 |
| N | 17.593058000000 | 27.091570000000 | 27.035284000000 |
| N | 16.057366000000 | 28.623973000000 | 27.566034000000 |
| N | 14.164937000000 | 26.346078000000 | 16.612239000000 |
| N | 16.031840000000 | 25.403270000000 | 17.386283000000 |
| N | 17.971438000000 | 24.857576000000 | 18.742870000000 |
| N | 19.449868000000 | 24.840682000000 | 20.405659000000 |
| N | 20.132410000000 | 25.731481000000 | 22.575238000000 |
| N | 19.752074000000 | 27.123042000000 | 24.268256000000 |
| N | 18.679751000000 | 28.797756000000 | 25.664948000000 |
| N | 17.312001000000 | 30.382556000000 | 26.435861000000 |
| C | 13.483161000000 | 23.670734000000 | 18.639091000000 |
| C | 15.636789000000 | 22.478629000000 | 18.861141000000 |
| H | 16.065344000000 | 21.842642000000 | 18.078928000000 |
| H | 14.991308000000 | 21.884603000000 | 19.508085000000 |
| C | 16.655648000000 | 22.943672000000 | 21.065886000000 |
| C | 18.294848000000 | 23.022629000000 | 22.895306000000 |
| C | 17.839110000000 | 24.497034000000 | 24.809042000000 |
| C | 18.180922000000 | 25.782240000000 | 26.892977000000 |
| C | 16.256747000000 | 27.261863000000 | 27.356981000000 |
| C | 14.908333000000 | 29.072900000000 | 28.314577000000 |
| C | 13.827058000000 | 24.944386000000 | 16.680819000000 |
| H | 13.446451000000 | 24.595757000000 | 15.713767000000 |
| C | 15.168514000000 | 24.269690000000 | 17.105511000000 |
| H | 15.612431000000 | 23.641890000000 | 16.324413000000 |
| C | 17.968518000000 | 23.470843000000 | 19.187218000000 |
| H | 18.357892000000 | 22.817641000000 | 18.398671000000 |
| C | 18.865369000000 | 23.520311000000 | 20.464099000000 |
| H | 19.650945000000 | 22.757139000000 | 20.482425000000 |
| C | 19.889852000000 | 24.842719000000 | 23.688900000000 |
| C | 19.784925000000 | 25.816025000000 | 24.906272000000 |
| C | 18.326743000000 | 28.327620000000 | 26.992928000000 |
| C | 17.285262000000 | 29.383851000000 | 27.478151000000 |
| C | 15.434469000000 | 26.613163000000 | 17.076671000000 |
| C | 17.467541000000 | 25.283604000000 | 17.460518000000 |
| H | 17.802644000000 | 24.575396000000 | 16.691090000000 |
| H | 17.893187000000 | 26.265474000000 | 17.257373000000 |
| C | 18.869762000000 | 25.634534000000 | 19.442003000000 |
| C | 20.519764000000 | 25.315433000000 | 21.249693000000 |
| H | 21.271567000000 | 24.525793000000 | 21.336230000000 |

|   |                 |                 |                 |
|---|-----------------|-----------------|-----------------|
| H | 20.953984000000 | 26.183936000000 | 20.756119000000 |
| C | 19.981163000000 | 27.058365000000 | 22.911827000000 |
| C | 19.878425000000 | 28.366628000000 | 24.985172000000 |
| C | 18.086873000000 | 30.010906000000 | 25.358667000000 |
| C | 16.770490000000 | 31.711482000000 | 26.575825000000 |
| O | 15.332313000000 | 33.251322000000 | 24.654172000000 |
| O | 12.541258000000 | 33.772844000000 | 22.485624000000 |
| O | 11.446467000000 | 32.370971000000 | 19.087009000000 |
| O | 12.797729000000 | 30.013112000000 | 16.769810000000 |
| O | 12.323427000000 | 28.685442000000 | 27.089879000000 |
| O | 9.157025000000  | 29.563228000000 | 25.006173000000 |
| O | 8.214582000000  | 28.358426000000 | 22.089668000000 |
| O | 10.018988000000 | 25.711165000000 | 19.876660000000 |
| N | 15.333829000000 | 31.798573000000 | 26.462941000000 |
| N | 13.461357000000 | 32.920735000000 | 25.982721000000 |
| N | 11.545306000000 | 33.399338000000 | 24.545447000000 |
| N | 10.342831000000 | 33.059696000000 | 22.693603000000 |
| N | 9.650823000000  | 32.169731000000 | 20.543188000000 |
| N | 9.650409000000  | 30.969384000000 | 18.659007000000 |
| N | 10.632900000000 | 29.292127000000 | 17.180661000000 |
| N | 12.196902000000 | 27.773969000000 | 16.686260000000 |
| N | 14.098161000000 | 30.062662000000 | 27.650491000000 |
| N | 12.237272000000 | 30.990605000000 | 26.846153000000 |
| N | 10.297357000000 | 31.521477000000 | 25.486502000000 |
| N | 8.814400000000  | 31.525555000000 | 23.827268000000 |
| N | 8.115202000000  | 30.631237000000 | 21.662256000000 |
| N | 8.524104000000  | 29.243397000000 | 19.971519000000 |
| N | 9.582136000000  | 27.572718000000 | 18.563149000000 |
| N | 10.935979000000 | 25.988783000000 | 17.769073000000 |
| C | 14.769446000000 | 32.713747000000 | 25.576417000000 |
| C | 12.616733000000 | 33.913523000000 | 25.362913000000 |
| C | 11.598175000000 | 33.436751000000 | 23.158685000000 |
| C | 9.957584000000  | 33.339555000000 | 21.331156000000 |
| C | 10.387494000000 | 31.884242000000 | 19.398477000000 |
| C | 10.026908000000 | 30.594725000000 | 17.317932000000 |
| C | 11.976520000000 | 29.135991000000 | 16.881516000000 |
| C | 13.359812000000 | 27.340773000000 | 15.948466000000 |
| H | 13.983539000000 | 28.221224000000 | 15.796419000000 |
| H | 13.048137000000 | 26.937581000000 | 14.975938000000 |
| C | 14.438944000000 | 31.461003000000 | 27.550884000000 |
| C | 13.094754000000 | 32.129595000000 | 27.125899000000 |
| C | 10.289721000000 | 32.907063000000 | 25.040210000000 |
| C | 9.392230000000  | 32.848599000000 | 23.764144000000 |
| C | 8.357300000000  | 31.520427000000 | 20.549160000000 |
| C | 8.452602000000  | 30.548800000000 | 19.330956000000 |
| C | 9.918309000000  | 28.045583000000 | 17.231033000000 |
| H | 9.018558000000  | 28.087319000000 | 16.606698000000 |
| C | 10.971989000000 | 27.003315000000 | 16.743701000000 |
| H | 10.739498000000 | 26.566866000000 | 15.765508000000 |
| C | 12.836029000000 | 29.785266000000 | 27.172299000000 |
| C | 10.800581000000 | 31.103174000000 | 26.770942000000 |
| C | 9.406138000000  | 30.734889000000 | 24.787363000000 |
| C | 7.740089000000  | 31.045662000000 | 22.992294000000 |
| C | 8.291387000000  | 29.306389000000 | 21.329285000000 |
| C | 8.390250000000  | 27.998818000000 | 19.256624000000 |
| H | 7.572387000000  | 28.089104000000 | 18.529330000000 |

|   |                 |                 |                 |
|---|-----------------|-----------------|-----------------|
| H | 8.140029000000  | 27.231760000000 | 19.988511000000 |
| C | 10.175482000000 | 26.356489000000 | 18.857522000000 |
| C | 11.486187000000 | 24.664893000000 | 17.621685000000 |
| H | 11.062620000000 | 24.042798000000 | 18.409664000000 |
| H | 11.182992000000 | 24.274911000000 | 16.641340000000 |
| H | 19.161286000000 | 22.348375000000 | 22.893130000000 |
| H | 17.444817000000 | 22.528663000000 | 23.366866000000 |
| H | 20.701731000000 | 24.112397000000 | 23.775669000000 |
| H | 20.631910000000 | 25.750895000000 | 25.598065000000 |
| H | 19.221927000000 | 28.270494000000 | 27.622720000000 |
| H | 17.534343000000 | 29.835000000000 | 28.445597000000 |
| H | 14.830612000000 | 31.828509000000 | 28.506325000000 |
| H | 12.648457000000 | 32.756558000000 | 27.906141000000 |
| H | 9.896394000000  | 33.559173000000 | 25.827748000000 |
| H | 8.602651000000  | 33.607668000000 | 23.743921000000 |
| H | 7.548717000000  | 32.254876000000 | 20.466492000000 |
| H | 7.589007000000  | 30.596848000000 | 18.658603000000 |
| H | 20.140497000000 | 29.132558000000 | 24.256293000000 |
| H | 20.686344000000 | 28.274242000000 | 25.722978000000 |
| H | 17.188267000000 | 32.322699000000 | 25.776313000000 |
| H | 17.086926000000 | 32.110753000000 | 27.548435000000 |
| H | 13.259338000000 | 34.507734000000 | 24.713317000000 |
| H | 12.186523000000 | 34.550491000000 | 26.143188000000 |
| H | 10.805074000000 | 33.832805000000 | 20.854252000000 |
| H | 9.089717000000  | 34.012449000000 | 21.331978000000 |
| H | 10.766171000000 | 31.319702000000 | 16.977480000000 |
| H | 9.138409000000  | 30.642209000000 | 16.679236000000 |
| H | 19.062792000000 | 25.714818000000 | 27.539661000000 |
| H | 17.427345000000 | 25.065691000000 | 27.219747000000 |
| H | 15.236356000000 | 29.487473000000 | 29.276507000000 |
| H | 14.282449000000 | 28.197798000000 | 28.487338000000 |
| H | 6.983646000000  | 31.831434000000 | 22.912069000000 |
| H | 7.314106000000  | 30.175102000000 | 23.489408000000 |
| H | 10.380046000000 | 30.119729000000 | 26.977450000000 |
| H | 10.461410000000 | 31.812854000000 | 27.537320000000 |
| N | 16.772434000000 | 26.547289000000 | 22.304379000000 |
| N | 16.194685000000 | 26.288343000000 | 21.410404000000 |
| C | 15.744861000000 | 30.515077000000 | 20.642581000000 |
| C | 12.614420000000 | 25.911797000000 | 23.533616000000 |
| C | 14.764727000000 | 30.451691000000 | 19.517405000000 |
| H | 13.943384000000 | 31.152317000000 | 19.658774000000 |
| H | 15.226266000000 | 30.680411000000 | 18.549893000000 |
| H | 14.337010000000 | 29.445888000000 | 19.409996000000 |
| C | 15.503757000000 | 31.382343000000 | 21.834336000000 |
| H | 15.385112000000 | 30.786679000000 | 22.749609000000 |
| H | 16.339889000000 | 32.062537000000 | 22.032055000000 |
| H | 14.610012000000 | 31.992434000000 | 21.714064000000 |
| C | 13.645522000000 | 26.038879000000 | 24.607334000000 |
| H | 14.158391000000 | 27.010267000000 | 24.548800000000 |
| H | 13.227071000000 | 25.980982000000 | 25.616589000000 |
| H | 14.404972000000 | 25.262152000000 | 24.525802000000 |
| C | 12.874197000000 | 25.065110000000 | 22.330713000000 |
| H | 12.006070000000 | 24.475368000000 | 22.022993000000 |
| H | 13.143435000000 | 25.684212000000 | 21.462438000000 |
| H | 13.697443000000 | 24.372259000000 | 22.500914000000 |
| C | 16.933101000000 | 29.693031000000 | 20.593250000000 |

|   |                 |                 |                 |
|---|-----------------|-----------------|-----------------|
| C | 11.404555000000 | 26.702079000000 | 23.605923000000 |
| N | 17.160283000000 | 28.893546000000 | 19.549864000000 |
| N | 17.809955000000 | 29.708075000000 | 21.598428000000 |
| N | 10.506169000000 | 26.657897000000 | 22.620665000000 |
| N | 11.176640000000 | 27.500639000000 | 24.650377000000 |
| H | 17.698112000000 | 30.296264000000 | 22.415056000000 |
| H | 18.652593000000 | 29.135728000000 | 21.588873000000 |
| H | 16.529266000000 | 28.828261000000 | 18.760866000000 |
| H | 17.986443000000 | 28.300393000000 | 19.495553000000 |
| H | 10.336692000000 | 28.072765000000 | 24.716885000000 |
| H | 11.809863000000 | 27.569609000000 | 25.436784000000 |
| H | 9.654066000000  | 27.215242000000 | 22.643170000000 |
| H | 10.620720000000 | 26.076914000000 | 21.799696000000 |

## 2R<sup>•</sup> from AAPH@CB[8] in PCM model

Total Energy= -5461.23208585

Total and zero-point Energy= -5459.822500

Total and thermal Energy= -5459.731702

Total Energy and thermal Enthalpies= -5459.730757

Total and thermal Free Energy= -5459.951348

2 3

|   |                 |                 |                 |
|---|-----------------|-----------------|-----------------|
| O | 12.961417000000 | 23.095591000000 | 19.605124000000 |
| O | 15.904503000000 | 22.514050000000 | 21.745767000000 |
| O | 17.006994000000 | 23.891358000000 | 25.043224000000 |
| O | 15.546529000000 | 26.394444000000 | 27.360543000000 |
| O | 15.970588000000 | 27.681942000000 | 17.071623000000 |
| O | 19.214635000000 | 26.775982000000 | 19.057194000000 |
| O | 20.159641000000 | 28.027635000000 | 21.973160000000 |
| O | 18.323916000000 | 30.723571000000 | 24.195912000000 |
| N | 12.934697000000 | 24.545432000000 | 17.795989000000 |
| N | 14.832271000000 | 23.487169000000 | 18.293824000000 |
| N | 16.785641000000 | 22.985481000000 | 19.655418000000 |
| N | 18.084046000000 | 23.246245000000 | 21.447609000000 |
| N | 18.786040000000 | 24.162771000000 | 23.580670000000 |
| N | 18.699473000000 | 25.430279000000 | 25.411105000000 |
| N | 17.684445000000 | 27.121104000000 | 26.835020000000 |
| N | 16.159350000000 | 28.628021000000 | 27.443163000000 |
| N | 14.149539000000 | 26.318288000000 | 16.646203000000 |
| N | 16.048003000000 | 25.378975000000 | 17.343486000000 |
| N | 18.023588000000 | 24.833464000000 | 18.644777000000 |
| N | 19.528861000000 | 24.839221000000 | 20.282097000000 |
| N | 20.234049000000 | 25.759869000000 | 22.424313000000 |
| N | 19.804932000000 | 27.166487000000 | 24.094635000000 |
| N | 18.764306000000 | 28.853787000000 | 25.497479000000 |
| N | 17.359433000000 | 30.399039000000 | 26.273402000000 |
| C | 13.518510000000 | 23.654100000000 | 18.678178000000 |
| C | 15.686966000000 | 22.476351000000 | 18.870211000000 |
| H | 16.089932000000 | 21.852018000000 | 18.068081000000 |
| H | 15.067227000000 | 21.872905000000 | 19.530040000000 |
| C | 16.817186000000 | 22.886751000000 | 21.031302000000 |
| C | 18.535340000000 | 22.978159000000 | 22.792976000000 |
| C | 18.039521000000 | 24.442325000000 | 24.709336000000 |
| C | 18.311903000000 | 25.823236000000 | 26.743314000000 |
| C | 16.369057000000 | 27.280083000000 | 27.216830000000 |
| C | 15.008011000000 | 29.086166000000 | 28.183089000000 |



|   |                 |                 |                 |
|---|-----------------|-----------------|-----------------|
| C | 13.824027000000 | 24.910510000000 | 16.710447000000 |
| H | 13.430969000000 | 24.562919000000 | 15.751648000000 |
| C | 15.170639000000 | 24.243843000000 | 17.112750000000 |
| H | 15.586458000000 | 23.591872000000 | 16.340669000000 |
| C | 18.033575000000 | 23.450257000000 | 19.102713000000 |
| H | 18.378917000000 | 22.787021000000 | 18.306325000000 |
| C | 18.983143000000 | 23.500531000000 | 20.337571000000 |
| H | 19.785895000000 | 22.760159000000 | 20.310734000000 |
| C | 20.046388000000 | 24.881988000000 | 23.558124000000 |
| C | 19.903650000000 | 25.869669000000 | 24.753277000000 |
| C | 18.417199000000 | 28.364882000000 | 26.821666000000 |
| C | 17.376874000000 | 29.406063000000 | 27.325620000000 |
| C | 15.441671000000 | 26.578490000000 | 17.035688000000 |
| C | 17.486833000000 | 25.244451000000 | 17.368816000000 |
| H | 17.786777000000 | 24.521450000000 | 16.602963000000 |
| H | 17.915009000000 | 26.217281000000 | 17.137104000000 |
| C | 18.942225000000 | 25.608436000000 | 19.310575000000 |
| C | 20.614950000000 | 25.322460000000 | 21.101615000000 |
| H | 21.361125000000 | 24.531781000000 | 21.196511000000 |
| H | 21.049869000000 | 26.178016000000 | 20.590026000000 |
| C | 20.063225000000 | 27.081867000000 | 22.746355000000 |
| C | 19.953845000000 | 28.417132000000 | 24.803279000000 |
| C | 18.158633000000 | 30.057053000000 | 25.209664000000 |
| C | 16.829423000000 | 31.730761000000 | 26.444339000000 |
| O | 15.371429000000 | 33.258395000000 | 24.508335000000 |
| O | 12.423535000000 | 33.880117000000 | 22.352835000000 |
| O | 11.345598000000 | 32.458950000000 | 19.068287000000 |
| O | 12.797940000000 | 29.988362000000 | 16.721994000000 |
| O | 12.393907000000 | 28.648398000000 | 27.045919000000 |
| O | 9.120511000000  | 29.555704000000 | 24.978549000000 |
| O | 8.110542000000  | 28.349884000000 | 22.072039000000 |
| O | 9.986424000000  | 25.698134000000 | 19.916908000000 |
| N | 15.393366000000 | 31.821431000000 | 26.327110000000 |
| N | 13.489875000000 | 32.854938000000 | 25.801117000000 |
| N | 11.545515000000 | 33.371035000000 | 24.435411000000 |
| N | 10.253853000000 | 33.112339000000 | 22.638726000000 |
| N | 9.540042000000  | 32.215396000000 | 20.501636000000 |
| N | 9.636496000000  | 30.945258000000 | 18.672900000000 |
| N | 10.658018000000 | 29.262578000000 | 17.241800000000 |
| N | 12.190378000000 | 27.752550000000 | 16.660328000000 |
| N | 14.187194000000 | 30.043400000000 | 27.480017000000 |
| N | 12.289185000000 | 30.946944000000 | 26.739300000000 |
| N | 10.331054000000 | 31.484617000000 | 25.406651000000 |
| N | 8.803601000000  | 31.512097000000 | 23.787674000000 |
| N | 8.073026000000  | 30.622760000000 | 21.640691000000 |
| N | 8.475512000000  | 29.224032000000 | 19.959101000000 |
| N | 9.556652000000  | 27.543986000000 | 18.579656000000 |
| N | 10.990302000000 | 25.998316000000 | 17.853129000000 |
| C | 14.809667000000 | 32.700525000000 | 25.432785000000 |
| C | 12.640296000000 | 33.872629000000 | 25.228523000000 |
| C | 11.515340000000 | 33.485641000000 | 23.060472000000 |
| C | 9.799876000000  | 33.392902000000 | 21.296698000000 |
| C | 10.299234000000 | 31.923366000000 | 19.385350000000 |
| C | 10.031534000000 | 30.560145000000 | 17.339262000000 |
| C | 11.976555000000 | 29.102414000000 | 16.870576000000 |
| C | 13.347284000000 | 27.286339000000 | 15.935341000000 |

|   |                 |                 |                 |
|---|-----------------|-----------------|-----------------|
| H | 13.972864000000 | 28.153812000000 | 15.737373000000 |
| H | 13.027446000000 | 26.839987000000 | 14.987914000000 |
| C | 14.496167000000 | 31.453816000000 | 27.405523000000 |
| C | 13.145897000000 | 32.097370000000 | 26.979764000000 |
| C | 10.305652000000 | 32.879707000000 | 24.979833000000 |
| C | 9.354674000000  | 32.848184000000 | 23.747053000000 |
| C | 8.273665000000  | 31.507500000000 | 20.513397000000 |
| C | 8.412847000000  | 30.526485000000 | 19.310544000000 |
| C | 9.925821000000  | 28.018353000000 | 17.257254000000 |
| H | 9.043505000000  | 28.079890000000 | 16.615616000000 |
| C | 10.975379000000 | 26.972595000000 | 16.782052000000 |
| H | 10.722680000000 | 26.494087000000 | 15.832615000000 |
| C | 12.905544000000 | 29.760385000000 | 27.074582000000 |
| C | 10.849390000000 | 31.062487000000 | 26.688141000000 |
| C | 9.398655000000  | 30.724972000000 | 24.739344000000 |
| C | 7.706061000000  | 31.050042000000 | 22.970178000000 |
| C | 8.220348000000  | 29.300704000000 | 21.307107000000 |
| C | 8.347826000000  | 27.976575000000 | 19.243212000000 |
| H | 7.552293000000  | 28.071861000000 | 18.496570000000 |
| H | 8.076222000000  | 27.213680000000 | 19.969632000000 |
| C | 10.168022000000 | 26.350346000000 | 18.896841000000 |
| C | 11.499102000000 | 24.655740000000 | 17.695144000000 |
| H | 11.073766000000 | 24.044531000000 | 18.487957000000 |
| H | 11.171929000000 | 24.274316000000 | 16.721929000000 |
| H | 19.446036000000 | 22.372352000000 | 22.753474000000 |
| H | 17.746002000000 | 22.420308000000 | 23.292875000000 |
| H | 20.888539000000 | 24.192219000000 | 23.650226000000 |
| H | 20.751453000000 | 25.856493000000 | 25.442142000000 |
| H | 19.309707000000 | 28.296043000000 | 27.448165000000 |
| H | 17.639104000000 | 29.865154000000 | 28.281832000000 |
| H | 14.872998000000 | 31.816033000000 | 28.365438000000 |
| H | 12.707942000000 | 32.745199000000 | 27.742939000000 |
| H | 9.953949000000  | 33.519734000000 | 25.792274000000 |
| H | 8.555134000000  | 33.591731000000 | 23.784132000000 |
| H | 7.438193000000  | 32.205332000000 | 20.422600000000 |
| H | 7.576050000000  | 30.563899000000 | 18.609357000000 |
| H | 20.208315000000 | 29.178611000000 | 24.069342000000 |
| H | 20.769457000000 | 28.321022000000 | 25.528325000000 |
| H | 17.255144000000 | 32.359080000000 | 25.665216000000 |
| H | 17.138484000000 | 32.103164000000 | 27.426556000000 |
| H | 13.263633000000 | 34.479634000000 | 24.575423000000 |
| H | 12.235961000000 | 34.492202000000 | 26.033860000000 |
| H | 10.591362000000 | 33.950338000000 | 20.799738000000 |
| H | 8.892255000000  | 34.002931000000 | 21.341595000000 |
| H | 10.756934000000 | 31.291879000000 | 16.990034000000 |
| H | 9.148771000000  | 30.578042000000 | 16.694376000000 |
| H | 19.197580000000 | 25.812097000000 | 27.384327000000 |
| H | 17.589910000000 | 25.092254000000 | 27.100926000000 |
| H | 15.337351000000 | 29.539536000000 | 29.123542000000 |
| H | 14.393261000000 | 28.213813000000 | 28.393074000000 |
| H | 6.968922000000  | 31.850825000000 | 22.891023000000 |
| H | 7.264821000000  | 30.193334000000 | 23.474394000000 |
| H | 10.430177000000 | 30.081493000000 | 26.900453000000 |
| H | 10.524578000000 | 31.770760000000 | 27.458022000000 |
| N | 15.423048000000 | 28.857585000000 | 24.169885000000 |
| N | 14.403836000000 | 29.232842000000 | 24.308128000000 |

|   |                 |                 |                 |
|---|-----------------|-----------------|-----------------|
| C | 15.635508000000 | 30.220505000000 | 20.659031000000 |
| C | 12.642311000000 | 26.103762000000 | 23.395857000000 |
| C | 14.583432000000 | 29.970581000000 | 19.627679000000 |
| H | 13.773200000000 | 30.693139000000 | 19.718118000000 |
| H | 14.967787000000 | 30.032785000000 | 18.605078000000 |
| H | 14.152128000000 | 28.966952000000 | 19.736118000000 |
| C | 15.369167000000 | 31.257617000000 | 21.694545000000 |
| H | 16.112925000000 | 31.334430000000 | 22.484716000000 |
| H | 15.291839000000 | 32.242285000000 | 21.216496000000 |
| H | 14.396084000000 | 31.078846000000 | 22.163195000000 |
| C | 13.600194000000 | 25.941699000000 | 24.525147000000 |
| H | 13.434628000000 | 26.597451000000 | 25.377359000000 |
| H | 13.562012000000 | 24.907849000000 | 24.892753000000 |
| H | 14.625245000000 | 26.094956000000 | 24.174830000000 |
| C | 12.933727000000 | 25.391708000000 | 22.115014000000 |
| H | 12.099581000000 | 24.770407000000 | 21.774880000000 |
| H | 13.140594000000 | 26.102406000000 | 21.304523000000 |
| H | 13.803272000000 | 24.744347000000 | 22.221052000000 |
| C | 16.865700000000 | 29.466493000000 | 20.616736000000 |
| C | 11.442890000000 | 26.898631000000 | 23.510438000000 |
| N | 17.089127000000 | 28.617288000000 | 19.612842000000 |
| N | 17.795093000000 | 29.598477000000 | 21.563429000000 |
| N | 10.563454000000 | 26.922375000000 | 22.507966000000 |
| N | 11.186447000000 | 27.615023000000 | 24.605016000000 |
| H | 17.672274000000 | 30.173720000000 | 22.387298000000 |
| H | 18.650180000000 | 29.041921000000 | 21.550294000000 |
| H | 16.458875000000 | 28.518707000000 | 18.825403000000 |
| H | 17.950708000000 | 28.075967000000 | 19.546281000000 |
| H | 10.358069000000 | 28.207712000000 | 24.668294000000 |
| H | 11.840903000000 | 27.710930000000 | 25.371469000000 |
| H | 9.700274000000  | 27.462124000000 | 22.561613000000 |
| H | 10.655816000000 | 26.343583000000 | 21.681092000000 |

#### 4R<sup>•</sup> from 2AAPH@CB[8] in the gas phase

Total energy = -6106.00529581

Total and zero-point Energy= -6104.301862

Total and thermal Energy= -6104.188016

Total energy and thermal Enthalpies= -6104.187071

Total and thermal Free Energy= -6104.462075

4 5

|   |                |                 |                 |
|---|----------------|-----------------|-----------------|
| O | 1.125251000000 | -3.161865000000 | 3.217511000000  |
| O | 3.754066000000 | -0.384360000000 | 3.870663000000  |
| O | 3.868634000000 | 2.946775000000  | 3.931371000000  |
| O | 1.004573000000 | 5.001213000000  | 3.298753000000  |
| O | 3.897476000000 | -4.133119000000 | -2.070490000000 |
| O | 5.939763000000 | -1.597297000000 | -1.381758000000 |
| O | 4.900059000000 | 1.660088000000  | -1.711033000000 |
| O | 1.455453000000 | 3.700082000000  | -2.409780000000 |
| N | 1.266157000000 | -4.839857000000 | 1.626963000000  |
| N | 3.138513000000 | -3.773541000000 | 2.233793000000  |
| N | 4.823831000000 | -2.099362000000 | 2.737746000000  |
| N | 5.873469000000 | -0.142116000000 | 2.966005000000  |
| N | 5.540954000000 | 2.229827000000  | 2.490176000000  |
| N | 4.470992000000 | 4.146638000000  | 2.044814000000  |
| N | 2.494826000000 | 5.515412000000  | 1.598488000000  |
| N | 0.295844000000 | 5.693380000000  | 1.197637000000  |

|   |                 |                 |                 |
|---|-----------------|-----------------|-----------------|
| N | 2.289435000000  | -4.916797000000 | -0.587660000000 |
| N | 4.321107000000  | -4.407941000000 | 0.189823000000  |
| N | 5.983655000000  | -2.672511000000 | 0.664704000000  |
| N | 6.379481000000  | -0.474468000000 | 0.603094000000  |
| N | 6.222509000000  | 1.921464000000  | 0.165473000000  |
| N | 4.705623000000  | 3.488458000000  | -0.288972000000 |
| N | 2.641348000000  | 4.733703000000  | -0.704450000000 |
| N | 0.591494000000  | 5.478148000000  | -1.209304000000 |
| C | 1.764387000000  | -3.834649000000 | 2.443289000000  |
| C | 3.989214000000  | -3.171489000000 | 3.234071000000  |
| H | 4.627286000000  | -3.943279000000 | 3.682854000000  |
| H | 3.340100000000  | -2.745371000000 | 3.998850000000  |
| C | 4.711237000000  | -0.826061000000 | 3.269702000000  |
| C | 6.085606000000  | 1.228608000000  | 3.382797000000  |
| C | 4.537039000000  | 3.089431000000  | 2.939484000000  |
| C | 3.719370000000  | 5.348962000000  | 2.343882000000  |
| C | 1.242195000000  | 5.354701000000  | 2.172603000000  |
| C | -1.048049000000 | 6.060084000000  | 1.618337000000  |
| C | 2.280759000000  | -5.412422000000 | 0.784696000000  |
| H | 2.232292000000  | -6.506561000000 | 0.803016000000  |
| C | 3.604819000000  | -4.838477000000 | 1.364345000000  |
| H | 4.193835000000  | -5.570786000000 | 1.926879000000  |
| C | 6.093314000000  | -2.299773000000 | 2.060844000000  |
| H | 6.731948000000  | -3.004913000000 | 2.599693000000  |
| C | 6.657833000000  | -0.850981000000 | 1.995792000000  |
| H | 7.727267000000  | -0.777725000000 | 2.209160000000  |
| C | 6.248879000000  | 2.764170000000  | 1.345786000000  |
| C | 5.357240000000  | 3.975697000000  | 0.929757000000  |
| C | 2.430195000000  | 5.859549000000  | 0.209494000000  |
| C | 0.925227000000  | 6.208426000000  | -0.008429000000 |
| C | 3.539234000000  | -4.441773000000 | -0.950886000000 |
| C | 5.707366000000  | -4.014043000000 | 0.181641000000  |
| H | 6.281850000000  | -4.714079000000 | 0.792873000000  |
| H | 6.057103000000  | -4.071490000000 | -0.846947000000 |
| C | 6.079464000000  | -1.588338000000 | -0.169087000000 |
| C | 6.979960000000  | 0.706071000000  | -0.000600000000 |
| H | 7.975368000000  | 0.864717000000  | 0.423521000000  |
| H | 7.077385000000  | 0.511468000000  | -1.066256000000 |
| C | 5.239871000000  | 2.297270000000  | -0.718208000000 |
| C | 3.961621000000  | 4.360226000000  | -1.175297000000 |
| C | 1.546216000000  | 4.550360000000  | -1.539119000000 |
| C | -0.565540000000 | 5.729291000000  | -2.035418000000 |
| O | -2.351691000000 | 3.969264000000  | -3.418806000000 |
| O | -4.804313000000 | 1.928194000000  | -4.202480000000 |
| O | -3.589222000000 | -1.242567000000 | -3.847479000000 |
| O | -0.178977000000 | -3.484216000000 | -3.093732000000 |
| O | -2.729829000000 | 3.785071000000  | 2.398406000000  |
| O | -5.313865000000 | 0.768285000000  | 1.601531000000  |
| O | -5.419205000000 | -2.676226000000 | 1.536300000000  |
| O | -2.702231000000 | -4.503471000000 | 2.287969000000  |
| N | -1.811372000000 | 5.199711000000  | -1.523119000000 |
| N | -3.957634000000 | 4.689618000000  | -1.908307000000 |
| N | -5.680690000000 | 3.018824000000  | -2.355869000000 |
| N | -6.125885000000 | 0.846269000000  | -2.632322000000 |
| N | -5.672933000000 | -1.531797000000 | -2.879672000000 |
| N | -4.080554000000 | -3.062732000000 | -2.488119000000 |

|   |                 |                 |                 |
|---|-----------------|-----------------|-----------------|
| N | -2.050752000000 | -4.331392000000 | -2.003517000000 |
| N | -0.012242000000 | -5.043650000000 | -1.387608000000 |
| N | -2.118451000000 | 5.431992000000  | 0.877003000000  |
| N | -3.958005000000 | 4.218281000000  | 0.474394000000  |
| N | -5.566866000000 | 2.445298000000  | 0.018094000000  |
| N | -6.650574000000 | 0.505552000000  | -0.265161000000 |
| N | -6.168644000000 | -1.876463000000 | -0.512191000000 |
| N | -5.141802000000 | -3.850361000000 | -0.434571000000 |
| N | -3.096858000000 | -5.074757000000 | 0.077660000000  |
| N | -1.004738000000 | -5.144530000000 | 0.840468000000  |
| C | -2.670999000000 | 4.545751000000  | -2.407281000000 |
| C | -5.137941000000 | 4.323994000000  | -2.658158000000 |
| C | -5.455077000000 | 1.930229000000  | -3.190819000000 |
| C | -6.310362000000 | -0.354204000000 | -3.420629000000 |
| C | -4.355931000000 | -1.862444000000 | -3.149862000000 |
| C | -3.023128000000 | -3.917103000000 | -2.996888000000 |
| C | -0.686689000000 | -4.199968000000 | -2.261009000000 |
| C | 1.368225000000  | -5.421222000000 | -1.591753000000 |
| H | 1.690176000000  | -5.015113000000 | -2.549365000000 |
| H | 1.424804000000  | -6.516657000000 | -1.625511000000 |
| C | -2.538388000000 | 5.844351000000  | -0.438729000000 |
| C | -3.958150000000 | 5.229794000000  | -0.579502000000 |
| C | -6.408677000000 | 2.664583000000  | -1.175734000000 |
| C | -6.932711000000 | 1.229362000000  | -1.491981000000 |
| C | -6.250556000000 | -2.383882000000 | -1.886660000000 |
| C | -5.278240000000 | -3.593918000000 | -1.847542000000 |
| C | -2.319362000000 | -5.426797000000 | -1.083763000000 |
| H | -2.770290000000 | -6.276587000000 | -1.606966000000 |
| C | -0.913304000000 | -5.725083000000 | -0.493934000000 |
| H | -0.676772000000 | -6.793164000000 | -0.439472000000 |
| C | -2.904552000000 | 4.409031000000  | 1.377026000000  |
| C | -5.163082000000 | 3.547602000000  | 0.894679000000  |
| C | -5.809207000000 | 1.192198000000  | 0.563567000000  |
| C | -7.059128000000 | -0.857941000000 | 0.003237000000  |
| C | -5.552160000000 | -2.783238000000 | 0.326604000000  |
| C | -4.537054000000 | -5.035754000000 | 0.123512000000  |
| H | -4.930846000000 | -5.903587000000 | -0.411767000000 |
| H | -4.833952000000 | -5.096730000000 | 1.168359000000  |
| C | -2.311571000000 | -4.858684000000 | 1.191600000000  |
| C | -0.021877000000 | -5.434864000000 | 1.864172000000  |
| H | -0.411358000000 | -5.039454000000 | 2.800737000000  |
| H | 0.105908000000  | -6.521471000000 | 1.953548000000  |
| H | 7.160931000000  | 1.382098000000  | 3.509209000000  |
| H | 5.585154000000  | 1.359159000000  | 4.341745000000  |
| H | 7.277737000000  | 3.035912000000  | 1.598435000000  |
| H | 5.921696000000  | 4.889386000000  | 0.721446000000  |
| H | 3.111132000000  | 6.681554000000  | -0.032738000000 |
| H | 0.733908000000  | 7.278220000000  | -0.136932000000 |
| H | -2.518329000000 | 6.934622000000  | -0.533869000000 |
| H | -4.770907000000 | 5.948891000000  | -0.439988000000 |
| H | -7.200519000000 | 3.384221000000  | -0.950878000000 |
| H | -8.001913000000 | 1.188918000000  | -1.718460000000 |
| H | -7.281829000000 | -2.648304000000 | -2.136411000000 |
| H | -5.652475000000 | -4.479257000000 | -2.369941000000 |
| H | 3.838214000000  | 3.834320000000  | -2.120676000000 |
| H | 4.548034000000  | 5.272548000000  | -1.343978000000 |

|   |                 |                 |                 |
|---|-----------------|-----------------|-----------------|
| H | -0.394560000000 | 5.254939000000  | -3.000929000000 |
| H | -0.650944000000 | 6.814221000000  | -2.171469000000 |
| H | -4.867023000000 | 4.308653000000  | -3.713283000000 |
| H | -5.906069000000 | 5.081920000000  | -2.487177000000 |
| H | -5.867578000000 | -0.151314000000 | -4.395444000000 |
| H | -7.375985000000 | -0.568629000000 | -3.542367000000 |
| H | -2.486599000000 | -3.352141000000 | -3.758618000000 |
| H | -3.470450000000 | -4.809058000000 | -3.456329000000 |
| H | 4.362644000000  | 6.216354000000  | 2.168492000000  |
| H | 3.445421000000  | 5.302657000000  | 3.397643000000  |
| H | -1.174298000000 | 7.146173000000  | 1.543511000000  |
| H | -1.137899000000 | 5.756548000000  | 2.660976000000  |
| H | -8.058610000000 | -0.994677000000 | -0.418968000000 |
| H | -7.111381000000 | -0.986982000000 | 1.082338000000  |
| H | -4.971749000000 | 3.128616000000  | 1.881826000000  |
| H | -5.991800000000 | 4.264014000000  | 0.955677000000  |
| N | -1.556722000000 | -1.510028000000 | 2.945465000000  |
| N | -1.471311000000 | -1.819159000000 | 3.991650000000  |
| C | 0.900743000000  | 1.767324000000  | 1.232159000000  |
| C | -4.718674000000 | -1.718514000000 | 6.185661000000  |
| C | -0.216238000000 | 2.442610000000  | 0.524857000000  |
| H | -1.160870000000 | 2.189314000000  | 1.006955000000  |
| H | -0.122237000000 | 3.529378000000  | 0.624675000000  |
| H | -0.281585000000 | 2.215929000000  | -0.537561000000 |
| C | 0.868782000000  | 1.670719000000  | 2.720619000000  |
| H | 1.720205000000  | 2.179594000000  | 3.189270000000  |
| H | -0.037224000000 | 2.129749000000  | 3.111982000000  |
| H | 0.907211000000  | 0.626620000000  | 3.059688000000  |
| C | -5.319060000000 | -0.443506000000 | 6.670669000000  |
| H | -4.549933000000 | 0.336074000000  | 6.770548000000  |
| H | -6.109262000000 | -0.059575000000 | 6.022679000000  |
| H | -5.744642000000 | -0.581945000000 | 7.666514000000  |
| C | -4.140504000000 | -2.670029000000 | 7.178195000000  |
| H | -4.865581000000 | -3.455173000000 | 7.437900000000  |
| H | -3.231359000000 | -3.159206000000 | 6.818427000000  |
| H | -3.898170000000 | -2.153916000000 | 8.107468000000  |
| C | 2.024862000000  | 1.251308000000  | 0.503643000000  |
| C | -4.697797000000 | -2.035979000000 | 4.780865000000  |
| N | 2.982600000000  | 0.590638000000  | 1.162640000000  |
| N | 2.128736000000  | 1.387611000000  | -0.823457000000 |
| N | -5.031896000000 | -1.124545000000 | 3.863558000000  |
| N | -4.321749000000 | -3.247698000000 | 4.368338000000  |
| H | 1.573379000000  | 2.072109000000  | -1.328007000000 |
| H | 3.018324000000  | 1.190164000000  | -1.275485000000 |
| H | 2.935382000000  | 0.439716000000  | 2.165537000000  |
| H | 3.787556000000  | 0.220737000000  | 0.679498000000  |
| H | -4.189913000000 | -3.473452000000 | 3.387195000000  |
| H | -4.085343000000 | -3.960915000000 | 5.037117000000  |
| H | -5.165899000000 | -1.389151000000 | 2.890781000000  |
| H | -5.267715000000 | -0.184034000000 | 4.128952000000  |
| N | 2.772177000000  | -1.403528000000 | -1.879177000000 |
| N | 2.621745000000  | -1.382789000000 | -2.963623000000 |
| C | -1.236737000000 | -0.367944000000 | -1.393464000000 |
| C | 5.686469000000  | -1.409328000000 | -6.150071000000 |
| C | -0.821334000000 | -0.028800000000 | -2.781304000000 |
| H | -0.496335000000 | 1.017251000000  | -2.869222000000 |

|   |                 |                 |                 |
|---|-----------------|-----------------|-----------------|
| H | -0.014181000000 | -0.675805000000 | -3.113056000000 |
| H | -1.657103000000 | -0.166356000000 | -3.477875000000 |
| C | -0.536387000000 | -1.411332000000 | -0.588369000000 |
| H | -0.114024000000 | -0.999745000000 | 0.336963000000  |
| H | -1.220934000000 | -2.215320000000 | -0.293111000000 |
| H | 0.269019000000  | -1.862095000000 | -1.157582000000 |
| C | 5.713157000000  | -0.081388000000 | -6.828124000000 |
| H | 5.089742000000  | 0.668873000000  | -6.335631000000 |
| H | 6.739718000000  | 0.309874000000  | -6.878074000000 |
| H | 5.369332000000  | -0.174486000000 | -7.859177000000 |
| C | 5.808681000000  | -2.645105000000 | -6.975718000000 |
| H | 6.339755000000  | -3.453435000000 | -6.468062000000 |
| H | 4.816513000000  | -3.020681000000 | -7.266000000000 |
| H | 6.340357000000  | -2.430678000000 | -7.903820000000 |
| C | -2.340127000000 | 0.332210000000  | -0.791889000000 |
| C | 5.555167000000  | -1.496637000000 | -4.718792000000 |
| N | -2.953176000000 | 1.320009000000  | -1.446556000000 |
| N | -2.725151000000 | 0.022469000000  | 0.450892000000  |
| N | 5.390313000000  | -2.679365000000 | -4.124276000000 |
| N | 5.586689000000  | -0.394077000000 | -3.962606000000 |
| H | -2.234121000000 | -0.684591000000 | 0.975299000000  |
| H | -3.521741000000 | 0.451135000000  | 0.917969000000  |
| H | -2.737549000000 | 1.531735000000  | -2.412540000000 |
| H | -3.684028000000 | 1.865396000000  | -1.003940000000 |
| H | 5.573981000000  | -0.455172000000 | -2.949603000000 |
| H | 5.773628000000  | 0.502758000000  | -4.376498000000 |
| H | 5.242572000000  | -2.767466000000 | -3.124276000000 |
| H | 5.233815000000  | -3.505139000000 | -4.677280000000 |

**2R• and 2,2,3,3-tetramethylbutane-1,4-bisamidine (the compound generated by self-reaction of two R•) from 2AAPH@CB[8] in the gas phase**

Total Energy= -6106.06208141

Total and zero-point Energy= -6104.350364

Total and thermal Energy= -6104.239219

Total Energy and thermal Enthalpies= -6104.238275

Total and thermal Free Energy= -6104.505656

4 3

|   |                 |                 |                 |
|---|-----------------|-----------------|-----------------|
| O | -0.481402000000 | -4.862878000000 | 2.781976000000  |
| O | 2.347760000000  | -2.882479000000 | 3.367638000000  |
| O | 3.349835000000  | 0.794648000000  | 3.495360000000  |
| O | 2.193827000000  | 4.134842000000  | 3.471448000000  |
| O | 1.261560000000  | -3.600055000000 | -2.751761000000 |
| O | 5.105227000000  | -2.792040000000 | -1.891277000000 |
| O | 6.103086000000  | 0.306093000000  | -1.523261000000 |
| O | 3.697298000000  | 2.850377000000  | -1.975687000000 |
| N | -0.965633000000 | -5.568749000000 | 0.631289000000  |
| N | 1.164273000000  | -5.469418000000 | 1.265095000000  |
| N | 3.263334000000  | -4.490208000000 | 1.975344000000  |
| N | 4.434500000000  | -2.640778000000 | 2.378544000000  |
| N | 5.170975000000  | -0.348825000000 | 2.629728000000  |
| N | 5.229794000000  | 1.876668000000  | 2.673071000000  |
| N | 4.030284000000  | 3.904989000000  | 2.066593000000  |
| N | 2.455156000000  | 5.409417000000  | 1.553143000000  |
| N | -0.274133000000 | -4.906305000000 | -1.597471000000 |
| N | 1.891238000000  | -4.994150000000 | -1.010646000000 |

|   |                 |                 |                 |
|---|-----------------|-----------------|-----------------|
| N | 4.068652000000  | -4.138523000000 | -0.307906000000 |
| N | 5.754629000000  | -2.821419000000 | 0.331909000000  |
| N | 6.516662000000  | -0.504449000000 | 0.602944000000  |
| N | 5.966001000000  | 1.648667000000  | 0.367108000000  |
| N | 4.879528000000  | 3.761923000000  | -0.208494000000 |
| N | 2.889179000000  | 4.626994000000  | -0.716845000000 |
| C | -0.129823000000 | -5.253606000000 | 1.687025000000  |
| C | 2.267053000000  | -5.506685000000 | 2.191828000000  |
| H | 2.756876000000  | -6.483986000000 | 2.141518000000  |
| H | 1.847717000000  | -5.361307000000 | 3.186486000000  |
| C | 3.238640000000  | -3.288770000000 | 2.652492000000  |
| C | 4.915163000000  | -1.618483000000 | 3.271215000000  |
| C | 4.459122000000  | 0.777579000000  | 2.995249000000  |
| C | 4.856022000000  | 3.222730000000  | 3.038451000000  |
| C | 2.804940000000  | 4.443341000000  | 2.481678000000  |
| C | 1.337294000000  | 6.304507000000  | 1.766923000000  |
| C | -0.238228000000 | -5.923988000000 | -0.566986000000 |
| H | -0.575718000000 | -6.890386000000 | -0.956164000000 |
| C | 1.253585000000  | -5.924348000000 | -0.105951000000 |
| H | 1.732406000000  | -6.907435000000 | -0.158826000000 |
| C | 4.364932000000  | -4.572139000000 | 1.058024000000  |
| H | 4.809553000000  | -5.571730000000 | 1.064354000000  |
| C | 5.318948000000  | -3.450099000000 | 1.554201000000  |
| H | 6.173963000000  | -3.816210000000 | 2.130958000000  |
| C | 6.419065000000  | -0.021422000000 | 1.964993000000  |
| C | 6.303437000000  | 1.520843000000  | 1.788500000000  |
| C | 4.573791000000  | 4.614321000000  | 0.923564000000  |
| C | 3.342813000000  | 5.427944000000  | 0.428671000000  |
| C | 0.990456000000  | -4.401928000000 | -1.889290000000 |
| C | 3.316855000000  | -4.950921000000 | -1.248538000000 |
| H | 3.703191000000  | -5.977213000000 | -1.236534000000 |
| H | 3.476795000000  | -4.514953000000 | -2.233824000000 |
| C | 4.980900000000  | -3.197835000000 | -0.751917000000 |
| C | 6.836035000000  | -1.872800000000 | 0.232881000000  |
| H | 7.659749000000  | -2.210404000000 | 0.865709000000  |
| H | 7.168092000000  | -1.856928000000 | -0.802992000000 |
| C | 6.180805000000  | 0.457903000000  | -0.316029000000 |
| C | 6.049126000000  | 2.923699000000  | -0.325531000000 |
| C | 3.811068000000  | 3.671977000000  | -1.067936000000 |
| C | 1.900872000000  | 5.111605000000  | -1.663487000000 |
| O | -0.248558000000 | 3.596647000000  | -2.804168000000 |
| O | -4.090771000000 | 2.871818000000  | -3.937907000000 |
| O | -5.260382000000 | -0.058755000000 | -4.219408000000 |
| O | -2.767865000000 | -2.599334000000 | -3.632699000000 |
| O | -1.095037000000 | 5.093077000000  | 2.787010000000  |
| O | -4.310455000000 | 2.775084000000  | 2.025310000000  |
| O | -5.490366000000 | -0.735507000000 | 1.649716000000  |
| O | -3.976571000000 | -3.682774000000 | 1.909204000000  |
| N | 0.535888000000  | 5.068846000000  | -1.188473000000 |
| N | -1.635251000000 | 5.118297000000  | -1.737953000000 |
| N | -3.853280000000 | 4.149874000000  | -2.014188000000 |
| N | -5.744111000000 | 2.980214000000  | -2.312929000000 |
| N | -6.614187000000 | 0.705745000000  | -2.499161000000 |
| N | -5.990980000000 | -1.449933000000 | -2.509913000000 |
| N | -4.623406000000 | -3.468071000000 | -2.545770000000 |
| N | -2.592913000000 | -4.302302000000 | -2.061039000000 |



|   |                 |                 |                 |
|---|-----------------|-----------------|-----------------|
| N | 0.139091000000  | 5.984187000000  | 1.034964000000  |
| N | -1.977412000000 | 5.364173000000  | 0.655071000000  |
| N | -4.201629000000 | 4.408065000000  | 0.382306000000  |
| N | -5.624012000000 | 2.713870000000  | 0.117682000000  |
| N | -6.506902000000 | 0.459193000000  | -0.060267000000 |
| N | -6.519546000000 | -1.757838000000 | -0.148551000000 |
| N | -5.034192000000 | -3.691254000000 | -0.153795000000 |
| N | -3.286641000000 | -5.030353000000 | 0.150042000000  |
| C | -0.442511000000 | 4.492613000000  | -2.003184000000 |
| C | -2.810660000000 | 4.985303000000  | -2.568323000000 |
| C | -4.511888000000 | 3.269724000000  | -2.885648000000 |
| C | -6.688705000000 | 2.083481000000  | -2.940829000000 |
| C | -5.868864000000 | -0.235624000000 | -3.201610000000 |
| C | -5.637541000000 | -2.674887000000 | -3.201807000000 |
| C | -3.273761000000 | -3.353780000000 | -2.842210000000 |
| C | -1.344672000000 | -4.843542000000 | -2.571431000000 |
| H | -1.015198000000 | -4.189116000000 | -3.378124000000 |
| H | -1.522948000000 | -5.850977000000 | -2.972065000000 |
| C | -0.020415000000 | 6.154688000000  | -0.378597000000 |
| C | -1.550563000000 | 5.985095000000  | -0.589648000000 |
| C | -4.730926000000 | 4.601976000000  | -0.949564000000 |
| C | -5.905161000000 | 3.584581000000  | -1.024472000000 |
| C | -7.214378000000 | 0.165567000000  | -1.318582000000 |
| C | -6.992364000000 | -1.370987000000 | -1.467641000000 |
| C | -4.872440000000 | -4.354454000000 | -1.450516000000 |
| H | -5.723752000000 | -5.011302000000 | -1.649986000000 |
| C | -3.519116000000 | -5.102163000000 | -1.276484000000 |
| H | -3.543494000000 | -6.142584000000 | -1.614064000000 |
| C | -0.983896000000 | 5.432984000000  | 1.635336000000  |
| C | -3.365812000000 | 5.356736000000  | 1.074280000000  |
| C | -4.662781000000 | 3.249346000000  | 0.958500000000  |
| C | -6.573930000000 | 1.747149000000  | 0.602513000000  |
| C | -6.115623000000 | -0.677155000000 | 0.581802000000  |
| C | -6.291406000000 | -3.116308000000 | 0.276926000000  |
| H | -7.114512000000 | -3.728504000000 | -0.101789000000 |
| H | -6.308639000000 | -3.137025000000 | 1.364369000000  |
| C | -4.083353000000 | -4.097138000000 | 0.757756000000  |
| C | -2.355055000000 | -5.875373000000 | 0.855994000000  |
| H | -2.543351000000 | -5.762030000000 | 1.922356000000  |
| H | -2.550118000000 | -6.912410000000 | 0.561840000000  |
| H | 5.836637000000  | -1.957830000000 | 3.760683000000  |
| H | 4.143624000000  | -1.457774000000 | 4.023466000000  |
| H | 7.283125000000  | -0.341594000000 | 2.553219000000  |
| H | 7.218881000000  | 2.069590000000  | 2.023746000000  |
| H | 5.437498000000  | 5.228706000000  | 1.192612000000  |
| H | 3.577398000000  | 6.448830000000  | 0.114852000000  |
| H | 0.366897000000  | 7.122656000000  | -0.712107000000 |
| H | -2.078833000000 | 6.926352000000  | -0.770839000000 |
| H | -5.041455000000 | 5.642095000000  | -1.093296000000 |
| H | -6.894639000000 | 4.040335000000  | -0.919895000000 |
| H | -8.264294000000 | 0.457028000000  | -1.227699000000 |
| H | -7.898863000000 | -1.927063000000 | -1.723334000000 |
| H | 6.205924000000  | 2.706478000000  | -1.379549000000 |
| H | 6.905277000000  | 3.491202000000  | 0.050601000000  |
| H | 1.964177000000  | 4.487661000000  | -2.553524000000 |
| H | 2.156737000000  | 6.145001000000  | -1.932680000000 |

|   |                 |                 |                 |
|---|-----------------|-----------------|-----------------|
| H | -2.511792000000 | 4.524867000000  | -3.509476000000 |
| H | -3.194103000000 | 5.994385000000  | -2.764181000000 |
| H | -6.469069000000 | 2.083583000000  | -4.008138000000 |
| H | -7.701049000000 | 2.458256000000  | -2.774330000000 |
| H | -5.244684000000 | -2.376246000000 | -4.173861000000 |
| H | -6.524580000000 | -3.301079000000 | -3.342093000000 |
| H | 5.774309000000  | 3.788986000000  | 3.223621000000  |
| H | 4.273318000000  | 3.168236000000  | 3.957446000000  |
| H | 1.652563000000  | 7.319660000000  | 1.509969000000  |
| H | 1.085877000000  | 6.256099000000  | 2.825953000000  |
| H | -7.589023000000 | 2.141324000000  | 0.479780000000  |
| H | -6.383814000000 | 1.592028000000  | 1.662607000000  |
| H | -3.371292000000 | 5.103193000000  | 2.133225000000  |
| H | -3.799723000000 | 6.354788000000  | 0.938329000000  |
| N | 0.115166000000  | -1.295686000000 | 4.844629000000  |
| N | 0.985266000000  | -1.096784000000 | 5.479200000000  |
| C | -2.902395000000 | -0.188434000000 | 5.695759000000  |
| C | -2.270470000000 | 1.128745000000  | 5.982904000000  |
| H | -2.080015000000 | 1.740861000000  | 5.100440000000  |
| H | -2.902921000000 | 1.712227000000  | 6.666943000000  |
| H | -1.320120000000 | 0.982834000000  | 6.501618000000  |
| C | -2.820307000000 | -1.276195000000 | 6.714530000000  |
| H | -3.809289000000 | -1.666907000000 | 6.979453000000  |
| H | -2.219393000000 | -2.120797000000 | 6.351513000000  |
| H | -2.352427000000 | -0.917218000000 | 7.629679000000  |
| C | -3.631021000000 | -0.414871000000 | 4.477369000000  |
| N | -3.824772000000 | 0.562301000000  | 3.589216000000  |
| N | -4.104943000000 | -1.634184000000 | 4.185880000000  |
| H | -4.681712000000 | -1.793017000000 | 3.367285000000  |
| H | -3.982085000000 | -2.401305000000 | 4.825579000000  |
| H | -4.441602000000 | 0.413626000000  | 2.794760000000  |
| H | -3.612734000000 | 1.525995000000  | 3.794166000000  |
| N | 2.941226000000  | -0.729430000000 | -2.246994000000 |
| N | 2.940102000000  | -0.914072000000 | -3.326082000000 |
| C | 6.006848000000  | -0.169924000000 | -6.308559000000 |
| C | 5.618838000000  | 1.022350000000  | -7.115767000000 |
| H | 4.758608000000  | 1.559923000000  | -6.709612000000 |
| H | 6.457245000000  | 1.729851000000  | -7.193083000000 |
| H | 5.372641000000  | 0.725608000000  | -8.136244000000 |
| C | 6.577957000000  | -1.358363000000 | -7.005016000000 |
| H | 7.324898000000  | -1.890540000000 | -6.411612000000 |
| H | 5.784745000000  | -2.071886000000 | -7.272256000000 |
| H | 7.050792000000  | -1.058840000000 | -7.941323000000 |
| C | 5.838844000000  | -0.171511000000 | -4.878928000000 |
| N | 6.054068000000  | -1.282223000000 | -4.171863000000 |
| N | 5.454486000000  | 0.936910000000  | -4.235280000000 |
| H | 5.432205000000  | 0.961612000000  | -3.220407000000 |
| H | 5.362332000000  | 1.803738000000  | -4.736203000000 |
| H | 5.868711000000  | -1.341063000000 | -3.175078000000 |
| H | 6.216337000000  | -2.153869000000 | -4.647805000000 |
| C | -0.173948000000 | 0.763990000000  | 0.646738000000  |
| C | -1.308470000000 | 1.690372000000  | 0.151837000000  |
| H | -1.525465000000 | 1.607761000000  | -0.913541000000 |
| H | -2.222916000000 | 1.496044000000  | 0.709699000000  |
| H | -1.047627000000 | 2.729575000000  | 0.355176000000  |
| C | -0.110158000000 | 0.908835000000  | 2.181423000000  |

|   |                 |                 |                 |
|---|-----------------|-----------------|-----------------|
| H | 0.635672000000  | 0.271277000000  | 2.654964000000  |
| H | 0.097290000000  | 1.942868000000  | 2.465068000000  |
| H | -1.079017000000 | 0.645631000000  | 2.605894000000  |
| C | 1.142472000000  | 1.241530000000  | 0.020291000000  |
| N | 2.251740000000  | 1.234867000000  | 0.740978000000  |
| N | 1.184318000000  | 1.635834000000  | -1.233566000000 |
| H | 0.349039000000  | 1.834957000000  | -1.771924000000 |
| H | 2.056149000000  | 1.978637000000  | -1.648874000000 |
| H | 2.264201000000  | 1.009445000000  | 1.731780000000  |
| H | 3.131426000000  | 1.527975000000  | 0.337039000000  |
| C | -0.363042000000 | -0.786293000000 | 0.226760000000  |
| C | -0.639190000000 | -0.982882000000 | -1.283843000000 |
| H | 0.247709000000  | -0.741715000000 | -1.863190000000 |
| H | -0.872157000000 | -2.028243000000 | -1.482315000000 |
| H | -1.462510000000 | -0.385616000000 | -1.675726000000 |
| C | 0.891420000000  | -1.612476000000 | 0.573042000000  |
| H | 1.205943000000  | -1.525758000000 | 1.613216000000  |
| H | 0.714460000000  | -2.666565000000 | 0.359419000000  |
| H | 1.724309000000  | -1.306076000000 | -0.054830000000 |
| C | -1.570145000000 | -1.364586000000 | 0.976720000000  |
| N | -1.427246000000 | -2.199399000000 | 1.981188000000  |
| N | -2.790327000000 | -1.047248000000 | 0.573255000000  |
| H | -2.921304000000 | -0.478505000000 | -0.245971000000 |
| H | -3.626936000000 | -1.347503000000 | 1.067613000000  |
| H | -0.522047000000 | -2.491538000000 | 2.324087000000  |
| H | -2.229551000000 | -2.724138000000 | 2.333291000000  |

**2R<sup>•</sup> and 2,2,3,3-tetramethylbutane-1,4-bisamidine (the compound generated by self-reaction of two R<sup>•</sup>) from 2AAPH@CB[8] in PCM model**

Total Energy= -6106.69527173

Total and zero-point Energy= -6104.976443

Total and thermal Energy= -6104.868114

Total Energy and thermal Enthalpies= -6104.867170

Total and thermal Free Energy= -6105.119854

4 3

|   |                 |                 |                 |
|---|-----------------|-----------------|-----------------|
| O | 1.209782000000  | -4.852711000000 | -2.771177000000 |
| O | -2.287417000000 | -3.202459000000 | -3.496453000000 |
| O | -3.961014000000 | 0.180223000000  | -3.582823000000 |
| O | -3.281615000000 | 3.665326000000  | -3.461665000000 |
| O | -0.760591000000 | -4.323931000000 | 3.000932000000  |
| O | -4.595996000000 | -3.780554000000 | 2.049330000000  |
| O | -5.999799000000 | -0.812369000000 | 1.832911000000  |
| O | -4.079060000000 | 2.684452000000  | 2.350852000000  |
| N | 1.708117000000  | -5.538454000000 | -0.620151000000 |
| N | -0.422010000000 | -5.548771000000 | -1.271897000000 |
| N | -2.660632000000 | -4.870559000000 | -1.935757000000 |
| N | -4.276983000000 | -3.387424000000 | -2.327641000000 |
| N | -5.407396000000 | -1.233246000000 | -2.449901000000 |
| N | -5.743578000000 | 0.971035000000  | -2.339826000000 |
| N | -5.047071000000 | 3.284611000000  | -2.011920000000 |
| N | -3.492204000000 | 4.773909000000  | -1.434936000000 |
| N | 0.919862000000  | -5.192703000000 | 1.668130000000  |
| N | -1.206471000000 | -5.481158000000 | 1.041342000000  |
| N | -3.466215000000 | -4.906283000000 | 0.368952000000  |
| N | -5.314611000000 | -3.774931000000 | -0.147952000000 |

|   |                 |                 |                 |
|---|-----------------|-----------------|-----------------|
| N | -6.461951000000 | -1.627808000000 | -0.282670000000 |
| N | -6.267771000000 | 0.571661000000  | -0.006733000000 |
| N | -5.262888000000 | 2.754083000000  | 0.350909000000  |
| N | -3.997695000000 | 4.506494000000  | 0.942369000000  |
| C | 0.867237000000  | -5.263936000000 | -1.670532000000 |
| C | -1.498510000000 | -5.678326000000 | -2.231511000000 |
| H | -1.814448000000 | -6.723780000000 | -2.290547000000 |
| H | -1.107318000000 | -5.363886000000 | -3.196493000000 |
| C | -3.001182000000 | -3.762874000000 | -2.671741000000 |
| C | -5.034211000000 | -2.454895000000 | -3.133390000000 |
| C | -4.940440000000 | -0.012670000000 | -2.874179000000 |
| C | -5.759050000000 | 2.335388000000  | -2.833486000000 |
| C | -3.867693000000 | 3.880754000000  | -2.419301000000 |
| C | -2.499291000000 | 5.793720000000  | -1.705377000000 |
| C | 1.013832000000  | -6.084123000000 | 0.522470000000  |
| H | 1.454190000000  | -7.039557000000 | 0.818073000000  |
| C | -0.456946000000 | -6.193394000000 | 0.031822000000  |
| H | -0.813777000000 | -7.221952000000 | -0.057880000000 |
| C | -3.710606000000 | -5.262500000000 | -1.021808000000 |
| H | -3.930574000000 | -6.327388000000 | -1.119005000000 |
| C | -4.898738000000 | -4.334592000000 | -1.411663000000 |
| H | -5.726136000000 | -4.853271000000 | -1.898838000000 |
| C | -6.601804000000 | -1.105212000000 | -1.621133000000 |
| C | -6.691571000000 | 0.432359000000  | -1.395772000000 |
| C | -5.483116000000 | 3.738536000000  | -0.717579000000 |
| C | -4.478931000000 | 4.878769000000  | -0.375931000000 |
| C | -0.390609000000 | -4.924681000000 | 2.002472000000  |
| C | -2.621020000000 | -5.686419000000 | 1.247705000000  |
| H | -2.841096000000 | -6.750456000000 | 1.116931000000  |
| H | -2.860114000000 | -5.392365000000 | 2.267124000000  |
| C | -4.466326000000 | -4.108698000000 | 0.878141000000  |
| C | -6.534073000000 | -3.028849000000 | 0.067014000000  |
| H | -7.337559000000 | -3.490406000000 | -0.508634000000 |
| H | -6.763889000000 | -3.087031000000 | 1.128307000000  |
| C | -6.209052000000 | -0.643969000000 | 0.640215000000  |
| C | -6.319556000000 | 1.813327000000  | 0.722718000000  |
| C | -4.421203000000 | 3.273106000000  | 1.329854000000  |
| C | -3.208833000000 | 5.363097000000  | 1.811129000000  |
| O | -1.039616000000 | 4.450905000000  | 3.474641000000  |
| O | 2.779571000000  | 3.575575000000  | 4.385027000000  |
| O | 4.613302000000  | 0.406923000000  | 4.767357000000  |
| O | 2.846014000000  | -2.777089000000 | 4.065234000000  |
| O | 0.142255000000  | 4.871532000000  | -2.439028000000 |
| O | 3.776145000000  | 3.580513000000  | -1.648338000000 |
| O | 5.416111000000  | 0.283699000000  | -1.269416000000 |
| O | 4.392207000000  | -3.121957000000 | -1.700357000000 |
| N | -1.801624000000 | 5.404946000000  | 1.500328000000  |
| N | 0.364977000000  | 5.580783000000  | 2.017343000000  |
| N | 2.651441000000  | 4.874783000000  | 2.468499000000  |
| N | 4.491713000000  | 3.657189000000  | 2.825255000000  |
| N | 5.689363000000  | 1.544453000000  | 3.059982000000  |
| N | 5.731137000000  | -0.684468000000 | 3.055387000000  |
| N | 4.775457000000  | -2.906543000000 | 2.787172000000  |
| N | 3.077267000000  | -4.277836000000 | 2.311416000000  |
| N | -1.331114000000 | 5.726365000000  | -0.867210000000 |
| N | 0.841098000000  | 5.659705000000  | -0.372302000000 |

|   |                 |                 |                 |
|---|-----------------|-----------------|-----------------|
| N | 3.123269000000  | 4.981538000000  | 0.074015000000  |
| N | 4.847430000000  | 3.615465000000  | 0.403859000000  |
| N | 5.985044000000  | 1.489686000000  | 0.626219000000  |
| N | 6.197530000000  | -0.722064000000 | 0.655162000000  |
| N | 5.334176000000  | -2.975304000000 | 0.412177000000  |
| N | 3.844348000000  | -4.574852000000 | 0.019003000000  |
| C | -0.841734000000 | 5.068719000000  | 2.445023000000  |
| C | 1.516919000000  | 5.671570000000  | 2.886090000000  |
| C | 3.253379000000  | 3.984343000000  | 3.341728000000  |
| C | 5.466239000000  | 2.882181000000  | 3.564405000000  |
| C | 5.266405000000  | 0.420469000000  | 3.741722000000  |
| C | 5.598834000000  | -2.023197000000 | 3.584302000000  |
| C | 3.490586000000  | -3.255316000000 | 3.151612000000  |
| C | 1.965086000000  | -5.123237000000 | 2.671893000000  |
| H | 1.522942000000  | -4.713148000000 | 3.576896000000  |
| H | 2.329514000000  | -6.137475000000 | 2.870036000000  |
| C | -1.273288000000 | 6.275402000000  | 0.465664000000  |
| C | 0.248515000000  | 6.316350000000  | 0.776941000000  |
| C | 3.555150000000  | 5.303359000000  | 1.416697000000  |
| C | 4.805261000000  | 4.398257000000  | 1.624513000000  |
| C | 6.547813000000  | 1.225594000000  | 1.941514000000  |
| C | 6.635215000000  | -0.330169000000 | 1.980971000000  |
| C | 5.269213000000  | -3.687700000000 | 1.678635000000  |
| H | 6.238111000000  | -4.131926000000 | 1.916028000000  |
| C | 4.138586000000  | -4.726826000000 | 1.428513000000  |
| H | 4.424690000000  | -5.757054000000 | 1.651983000000  |
| C | -0.091963000000 | 5.356120000000  | -1.345907000000 |
| C | 2.239294000000  | 5.813673000000  | -0.702489000000 |
| C | 3.893698000000  | 4.003784000000  | -0.509370000000 |
| C | 5.974761000000  | 2.804077000000  | 0.024942000000  |
| C | 5.811354000000  | 0.347059000000  | -0.106997000000 |
| C | 6.384026000000  | -2.038137000000 | 0.094112000000  |
| H | 7.335997000000  | -2.435818000000 | 0.454446000000  |
| H | 6.421726000000  | -1.942409000000 | -0.988269000000 |
| C | 4.510344000000  | -3.514131000000 | -0.542014000000 |
| C | 3.144605000000  | -5.562867000000 | -0.766474000000 |
| H | 3.365174000000  | -5.372610000000 | -1.814271000000 |
| H | 3.512509000000  | -6.553533000000 | -0.485998000000 |
| H | -5.942649000000 | -2.948520000000 | -3.490192000000 |
| H | -4.411568000000 | -2.178774000000 | -3.981646000000 |
| H | -7.471245000000 | -1.535274000000 | -2.120591000000 |
| H | -7.687469000000 | 0.849436000000  | -1.550470000000 |
| H | -6.525714000000 | 4.059875000000  | -0.730107000000 |
| H | -4.927218000000 | 5.873098000000  | -0.350866000000 |
| H | -1.757616000000 | 7.254505000000  | 0.502917000000  |
| H | 0.644570000000  | 7.328526000000  | 0.890960000000  |
| H | 3.768090000000  | 6.371850000000  | 1.503163000000  |
| H | 5.736487000000  | 4.956065000000  | 1.750685000000  |
| H | 7.514579000000  | 1.723745000000  | 2.041831000000  |
| H | 7.640048000000  | -0.711522000000 | 2.175631000000  |
| H | -6.203792000000 | 1.572358000000  | 1.776834000000  |
| H | -7.286089000000 | 2.301119000000  | 0.566374000000  |
| H | -3.309871000000 | 4.982436000000  | 2.824834000000  |
| H | -3.630506000000 | 6.369858000000  | 1.752798000000  |
| H | 1.217058000000  | 5.313046000000  | 3.868307000000  |
| H | 1.819572000000  | 6.721822000000  | 2.954429000000  |

|   |                 |                 |                 |
|---|-----------------|-----------------|-----------------|
| H | 5.095947000000  | 2.781010000000  | 4.582394000000  |
| H | 6.415762000000  | 3.423778000000  | 3.567501000000  |
| H | 5.134009000000  | -1.929932000000 | 4.563562000000  |
| H | 6.588931000000  | -2.475626000000 | 3.687471000000  |
| H | -6.800192000000 | 2.646817000000  | -2.934447000000 |
| H | -5.277442000000 | 2.345470000000  | -3.808697000000 |
| H | -2.958420000000 | 6.779914000000  | -1.592075000000 |
| H | -2.175396000000 | 5.655368000000  | -2.734617000000 |
| H | 6.898919000000  | 3.319927000000  | 0.301438000000  |
| H | 5.944529000000  | 2.679744000000  | -1.055099000000 |
| H | 2.359758000000  | 5.535494000000  | -1.747071000000 |
| H | 2.527619000000  | 6.861317000000  | -0.565598000000 |
| N | -1.176588000000 | -0.883894000000 | -5.602602000000 |
| N | -2.154045000000 | -1.202270000000 | -5.979009000000 |
| C | 2.512288000000  | 0.304687000000  | -5.067593000000 |
| C | 1.751196000000  | 1.549233000000  | -5.370798000000 |
| H | 1.592376000000  | 2.198912000000  | -4.510006000000 |
| H | 2.277187000000  | 2.133765000000  | -6.138038000000 |
| H | 0.774071000000  | 1.294624000000  | -5.786359000000 |
| C | 2.363882000000  | -0.868808000000 | -5.975712000000 |
| H | 3.320352000000  | -1.348302000000 | -6.201479000000 |
| H | 1.709549000000  | -1.628744000000 | -5.529039000000 |
| H | 1.905907000000  | -0.565746000000 | -6.916547000000 |
| C | 3.400340000000  | 0.231454000000  | -3.937123000000 |
| N | 3.609682000000  | 1.286559000000  | -3.156744000000 |
| N | 4.020624000000  | -0.912632000000 | -3.629328000000 |
| H | 4.622980000000  | -0.972469000000 | -2.815122000000 |
| H | 3.864126000000  | -1.753206000000 | -4.158529000000 |
| H | 4.250782000000  | 1.221719000000  | -2.367823000000 |
| H | 3.218665000000  | 2.193609000000  | -3.347292000000 |
| N | 2.245178000000  | 0.913038000000  | 3.044529000000  |
| N | 2.750088000000  | 1.100645000000  | 2.090492000000  |
| C | -1.348683000000 | -0.269204000000 | 4.050860000000  |
| C | -1.233424000000 | 1.185183000000  | 4.350887000000  |
| H | -1.968213000000 | 1.824910000000  | 3.865549000000  |
| H | -1.327941000000 | 1.346990000000  | 5.433515000000  |
| H | -0.239791000000 | 1.550192000000  | 4.078937000000  |
| C | -0.243926000000 | -1.172372000000 | 4.489940000000  |
| H | -0.552640000000 | -1.763259000000 | 5.362496000000  |
| H | 0.057245000000  | -1.890962000000 | 3.723338000000  |
| H | 0.636361000000  | -0.597541000000 | 4.769306000000  |
| C | -2.543872000000 | -0.838335000000 | 3.474583000000  |
| N | -2.615026000000 | -2.148101000000 | 3.249769000000  |
| N | -3.591158000000 | -0.074437000000 | 3.161499000000  |
| H | -4.427482000000 | -0.461817000000 | 2.723978000000  |
| H | -3.591272000000 | 0.925363000000  | 3.292474000000  |
| H | -3.444448000000 | -2.580196000000 | 2.842517000000  |
| H | -1.822749000000 | -2.769293000000 | 3.372910000000  |
| C | -0.453145000000 | 0.682101000000  | -1.148279000000 |
| C | 0.803149000000  | 1.519068000000  | -0.841249000000 |
| H | 1.059101000000  | 1.579228000000  | 0.214701000000  |
| H | 1.666104000000  | 1.100298000000  | -1.355273000000 |
| H | 0.666610000000  | 2.533732000000  | -1.216640000000 |
| C | -0.689868000000 | 0.759127000000  | -2.668949000000 |
| H | -1.506778000000 | 0.132391000000  | -3.023940000000 |
| H | -0.899806000000 | 1.788992000000  | -2.960455000000 |

|   |                 |                 |                 |
|---|-----------------|-----------------|-----------------|
| H | 0.206679000000  | 0.442524000000  | -3.194388000000 |
| C | -1.661419000000 | 1.272121000000  | -0.419600000000 |
| N | -2.837894000000 | 1.253889000000  | -1.002273000000 |
| N | -1.531112000000 | 1.744998000000  | 0.806048000000  |
| H | -0.618083000000 | 1.873245000000  | 1.208028000000  |
| H | -2.323463000000 | 2.073341000000  | 1.350561000000  |
| H | -2.943311000000 | 0.932756000000  | -1.959566000000 |
| H | -3.677017000000 | 1.585162000000  | -0.532708000000 |
| C | -0.330255000000 | -0.848898000000 | -0.648770000000 |
| C | 0.170467000000  | -0.963683000000 | 0.802409000000  |
| H | -0.568798000000 | -0.552830000000 | 1.484491000000  |
| H | 0.310126000000  | -2.013356000000 | 1.062464000000  |
| H | 1.105319000000  | -0.443228000000 | 0.986020000000  |
| C | -1.690964000000 | -1.572263000000 | -0.705073000000 |
| H | -2.199046000000 | -1.455340000000 | -1.659104000000 |
| H | -1.552884000000 | -2.635760000000 | -0.510945000000 |
| H | -2.352817000000 | -1.190161000000 | 0.069535000000  |
| C | 0.662753000000  | -1.589089000000 | -1.555093000000 |
| N | 0.249459000000  | -2.225670000000 | -2.627072000000 |
| N | 1.944678000000  | -1.603798000000 | -1.239045000000 |
| H | 2.271086000000  | -1.171938000000 | -0.391137000000 |
| H | 2.642007000000  | -2.135275000000 | -1.759009000000 |
| H | -0.735561000000 | -2.345695000000 | -2.860947000000 |
| H | 0.865438000000  | -2.892827000000 | -3.085204000000 |
